# Supplementary material
Source: MDPI journal article supplement (https://www.mdpi.com/2073-4395/14/2/399)
Supplement: s1 [file s1]

## Supplementary materials

### Myricetin Inhibits Photodegradation of Profenofos in Water: Pathways and Mechanisms

Nan Zhang <sup>1</sup>, Yawei Yang <sup>1</sup>, Xin Wang <sup>1</sup>, Taozhong Shi <sup>1</sup>, Pei Lv <sup>1</sup>, Qing X. Li <sup>2</sup> and Rimaohua <sup>1,\*</sup>

<sup>1</sup> Key Laboratory of Agri-Food Safety of Anhui Province, School of Resource & Environment, Anhui Agricultural University, Hefei 230036, China; zhangnan@stu.ahau.edu.cn (N.Z.); yaweiyang@stu.ahau.edu.cn (Y.Y.); wx225@stu.ahau.edu.cn (X.W.); tzs@ahau.edu.cn (T.S.); lvpei@ahau.edu.cn (P.L.)

<sup>2</sup> Department of Molecular Biosciences and Bioengineering, University of Hawaii at Manoa, Honolulu, HI 96822, USA; qingl@hawaii.edu

\* Correspondence: rimaohua@ahau.edu.cn; Tel.: +86-551-65786320; Fax: +86-551-65786296

## Table of Contents

|                                                                                                                                                                       |     |
|-----------------------------------------------------------------------------------------------------------------------------------------------------------------------|-----|
| <b>Figure S1.</b> Spectral maps of the three artificial light sources.....                                                                                            | S3  |
| <b>Figure S2.</b> Absorption spectra of profenofos, myricetin and profenofos with myricetin (1:1 mol ratio) in water at 5 $\mu$ mol (with a 1 cm optical path). ..... | S3  |
| <b>Figure S3.</b> Extract ion chromatogram and secondary fragment ion of profenofos.....                                                                              | S4  |
| <b>Figure S4.</b> Extract ion chromatogram and secondary fragment ion of M1. ....                                                                                     | S5  |
| <b>Figure S5.</b> Extract ion chromatogram and secondary fragment ion of M2. ....                                                                                     | S6  |
| <b>Figure S6.</b> Extract ion chromatogram and secondary fragment ion of M3. ....                                                                                     | S7  |
| <b>Figure S7.</b> Extract ion chromatogram and secondary fragment ion of M4. ....                                                                                     | S8  |
| <b>Figure S8.</b> Extract ion chromatogram and secondary fragment ion of M5. ....                                                                                     | S9  |
| <b>Figure S9.</b> Extract ion chromatogram and secondary fragment ion of M6. ....                                                                                     | S10 |
| <b>Figure S10.</b> Extract ion chromatogram and secondary fragment ion of M7. ....                                                                                    | S11 |
| <b>Figure S11.</b> Extract ion chromatogram and secondary fragment ion of M8. ....                                                                                    | S12 |
| <b>Figure S12.</b> Extract ion chromatogram and secondary fragment ion of M9. ....                                                                                    | S13 |
| <b>Figure S13.</b> Extract ion chromatogram and secondary fragment ion of M10. ....                                                                                   | S14 |
| <b>Figure S14.</b> Extract ion chromatogram and secondary fragment ion of M11. ....                                                                                   | S15 |
| <b>Figure S15.</b> Extract ion chromatogram and secondary fragment ion of M12. ....                                                                                   | S16 |
| <b>Figure S16.</b> Extract ion chromatogram and secondary fragment ion of M13. ....                                                                                   | S17 |
| <b>Figure S17.</b> Extract ion chromatogram and secondary fragment ion of M14. ....                                                                                   | S18 |
| <b>Figure S18.</b> Extract ion chromatogram and secondary fragment ion of M15. ....                                                                                   | S19 |
| <b>Figure S19.</b> Extract ion chromatogram and secondary fragment ion of M16. ....                                                                                   | S20 |
| <b>Figure S20.</b> Extract ion chromatogram and secondary fragment ion of M17. ....                                                                                   | S21 |
| <b>Figure S21.</b> Extract ion chromatogram and secondary fragment ion of M18. ....                                                                                   | S22 |
| <b>Figure S22.</b> Extract ion chromatogram and secondary fragment ion of M19. ....                                                                                   | S23 |
| <b>Figure S23.</b> Extract ion chromatogram and secondary fragment ion of M20. ....                                                                                   | S24 |
| <b>Figure S24.</b> Extract ion chromatogram and secondary fragment ion of M21. ....                                                                                   | S25 |
| <b>Table S1.</b> Mobile phase of Thermofisher QE focus mass spectrometer (a) and Waters UPLC-Xevo TQ-S MS (b). ....                                                   | S26 |
| <b>Table S2.</b> The parent ions, daughter ion fragments and ion scanning mass spectrometry conditions of profenofos and photoproducts. ....                          | S27 |
| <b>Table S3.</b> Scanning mass spectrometry conditions for profenofos and its photoproducts.....                                                                      | S27 |
| <b>Table S4.</b> Precision and accuracy of the analytical method.....                                                                                                 | S29 |
| <b>Table S5.</b> Photoproducts toxicity prediction by ECOSAR. ....                                                                                                    | S30 |
| <b>Table S6.</b> Effect of myricetin on the decrease in photodegradation of four pesticides.....                                                                      | S30 |
| <b>Table S7.</b> Properties of paddy, farm ditch, and pond water. ....                                                                                                | S31 |

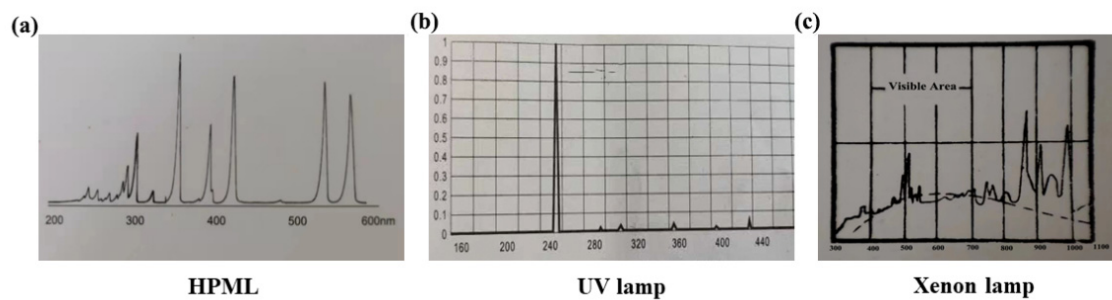

**Figure S1.** Spectral maps of the three artificial light sources.

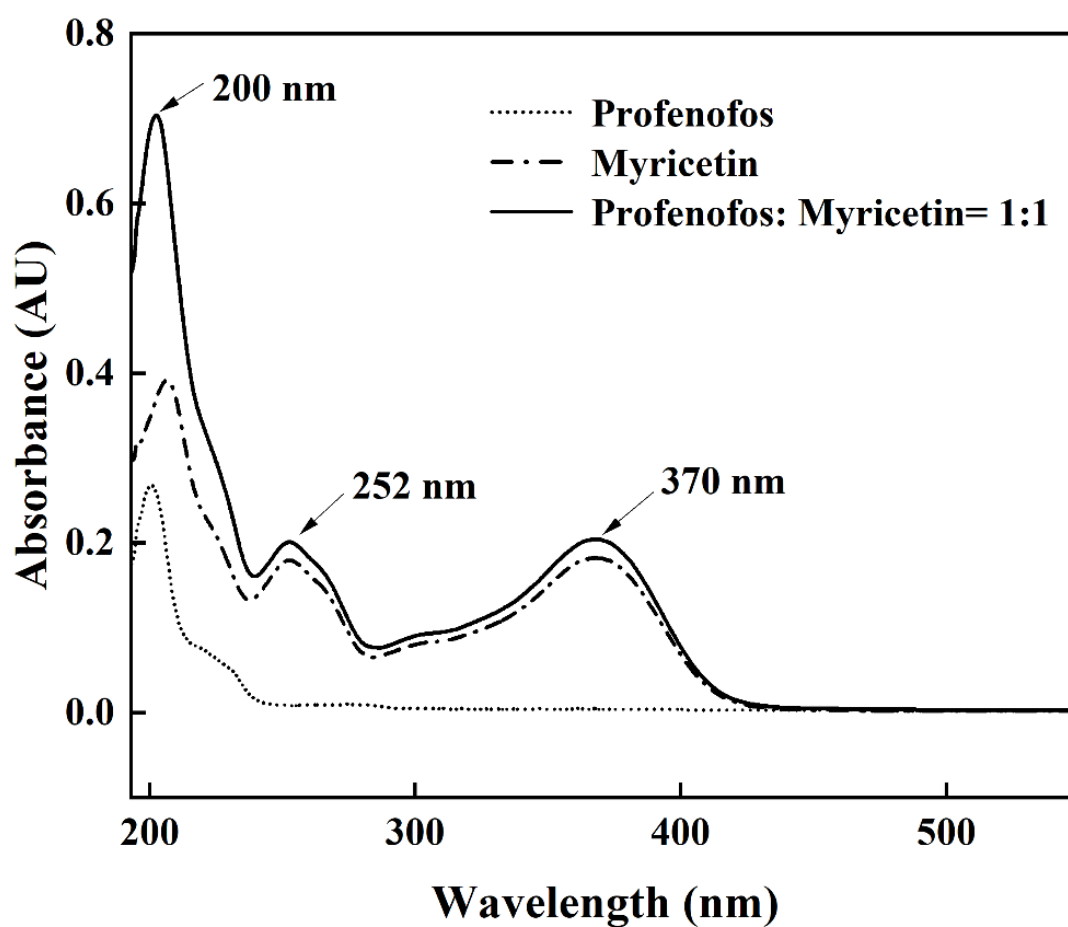

**Figure S2.** Absorption spectra of profenofos, myricetin and profenofos with myricetin (1:1 mol ratio) in water at 5  $\mu\text{mol}$  (with a 1 cm optical path).

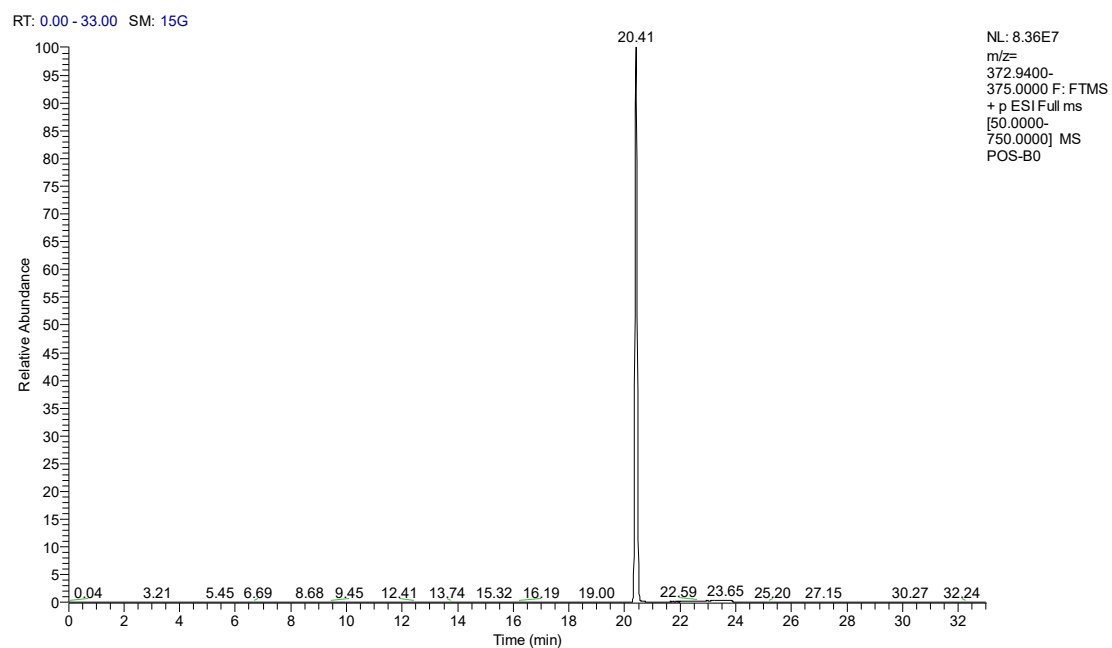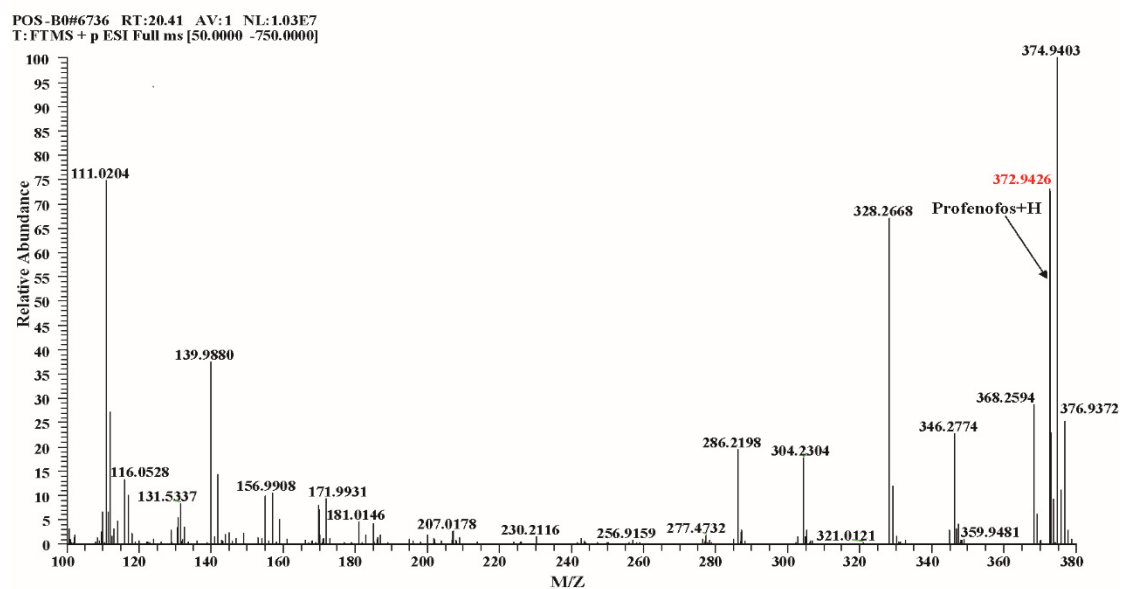

**Figure S3.** Extract ion chromatogram and secondary fragment ion of profenofos.

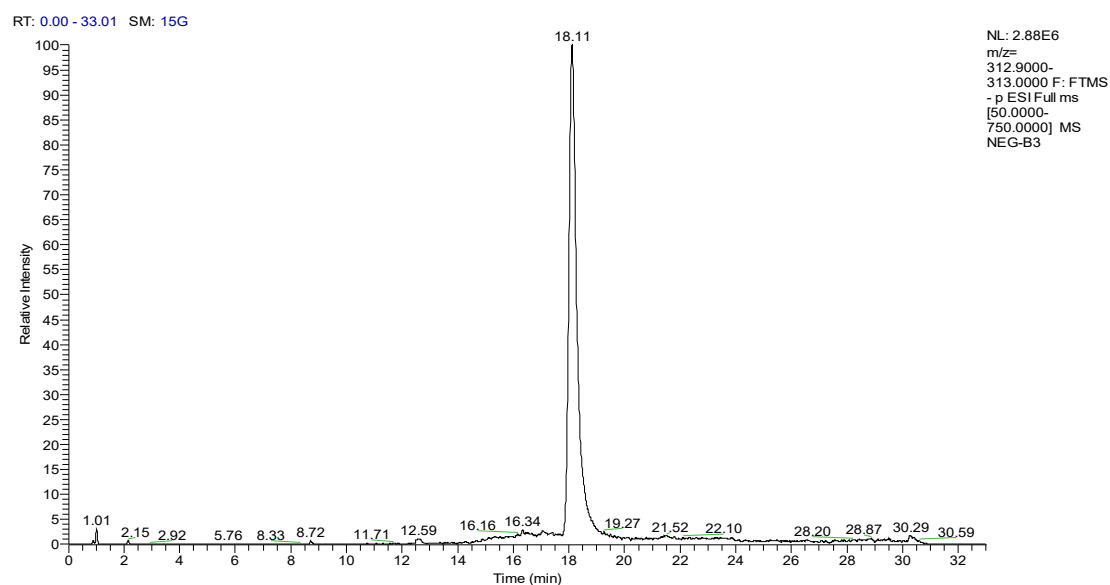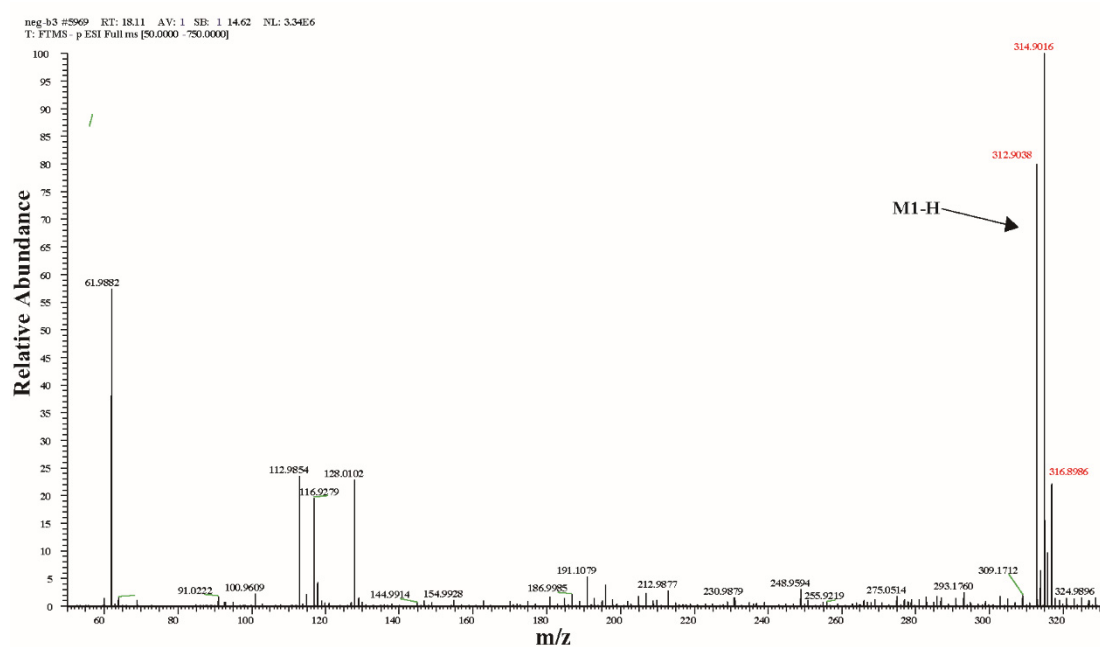

**Figure S4.** Extract ion chromatogram and secondary fragment ion of M1.

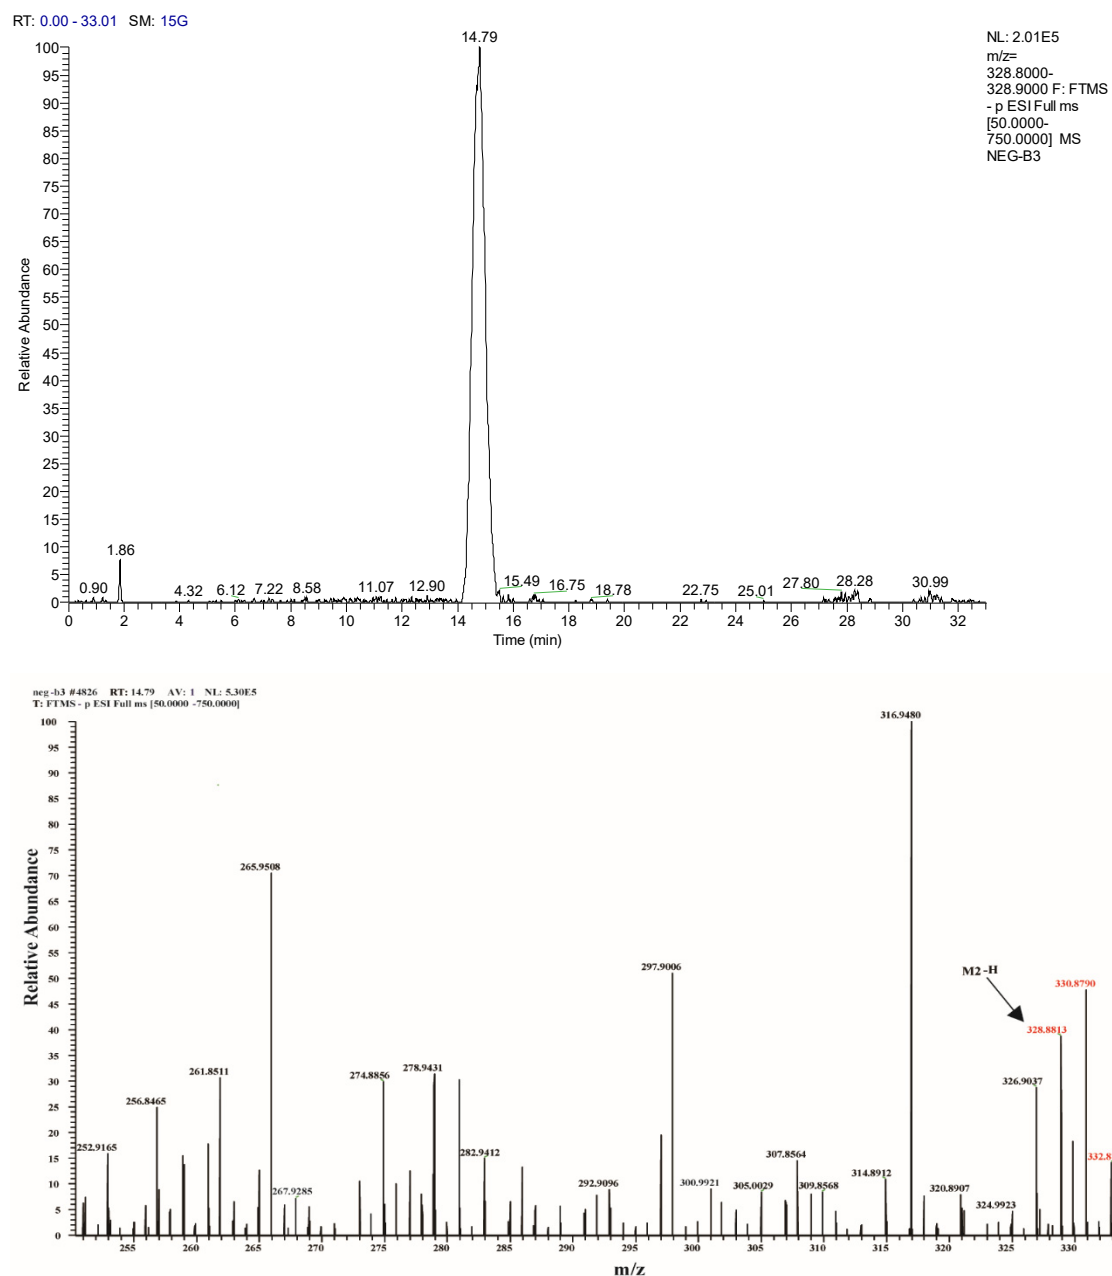

**Figure S5.** Extract ion chromatogram and secondary fragment ion of M2.

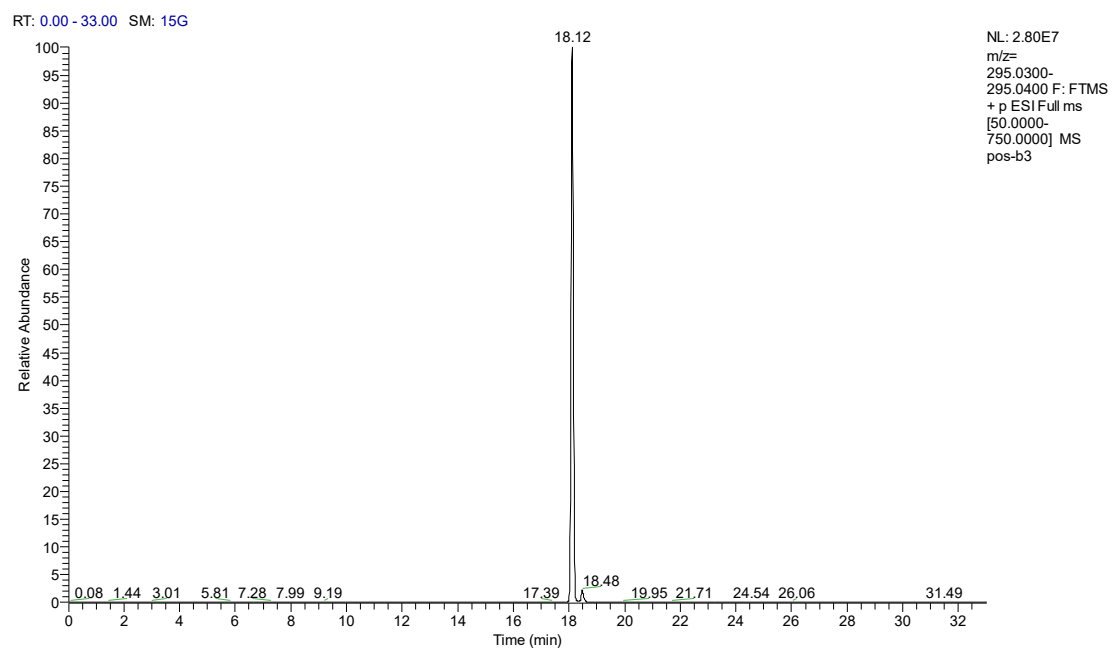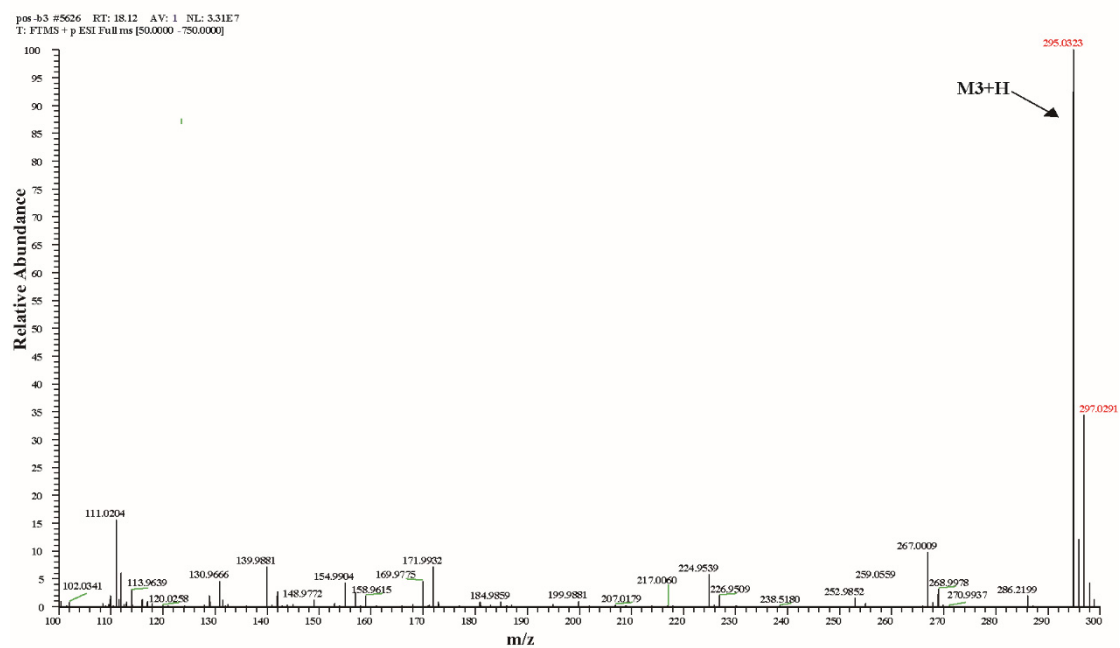

**Figure S6.** Extract ion chromatogram and secondary fragment ion of M3.

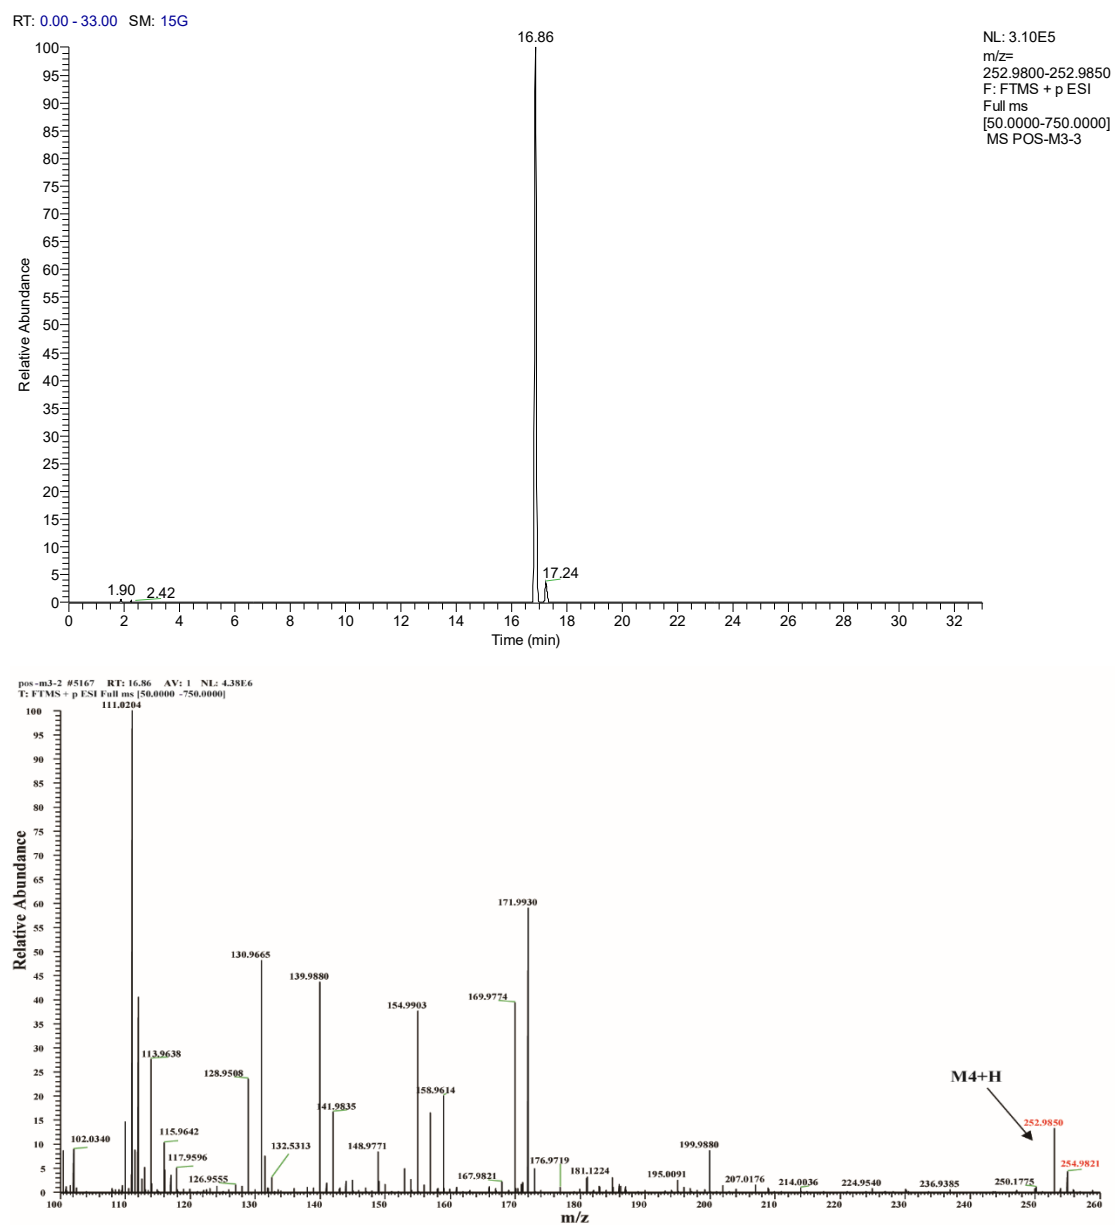

**Figure S7.** Extract ion chromatogram and secondary fragment ion of M4.



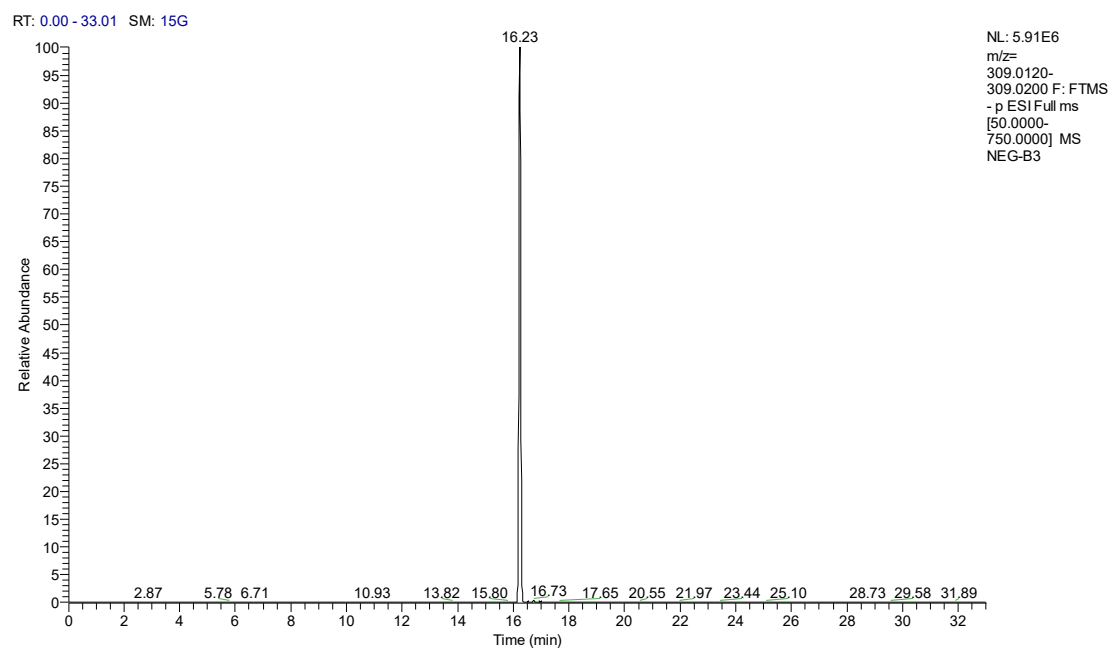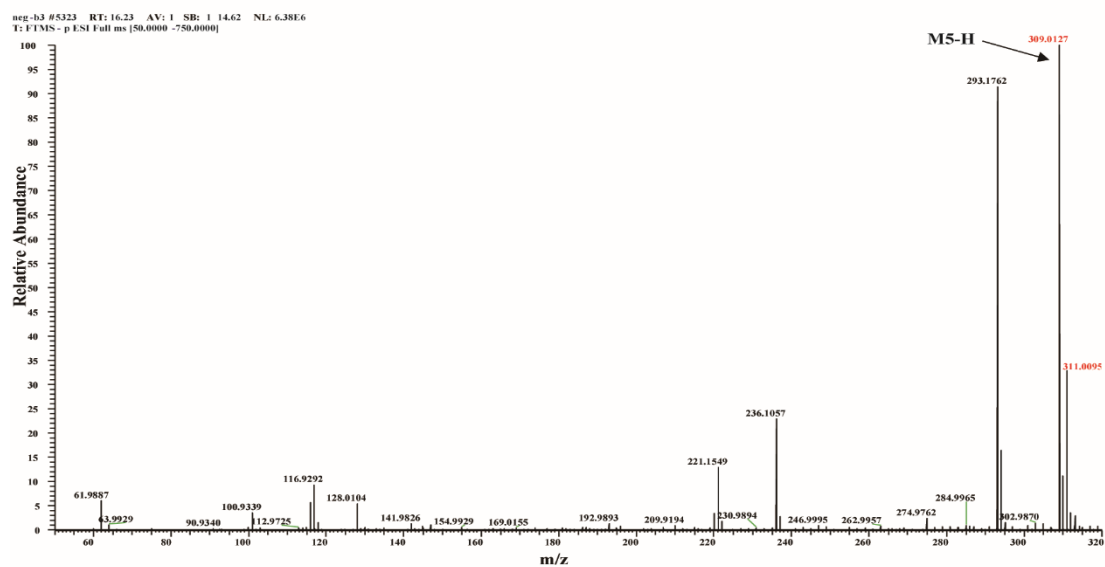

**Figure S8.** Extract ion chromatogram and secondary fragment ion of M5.

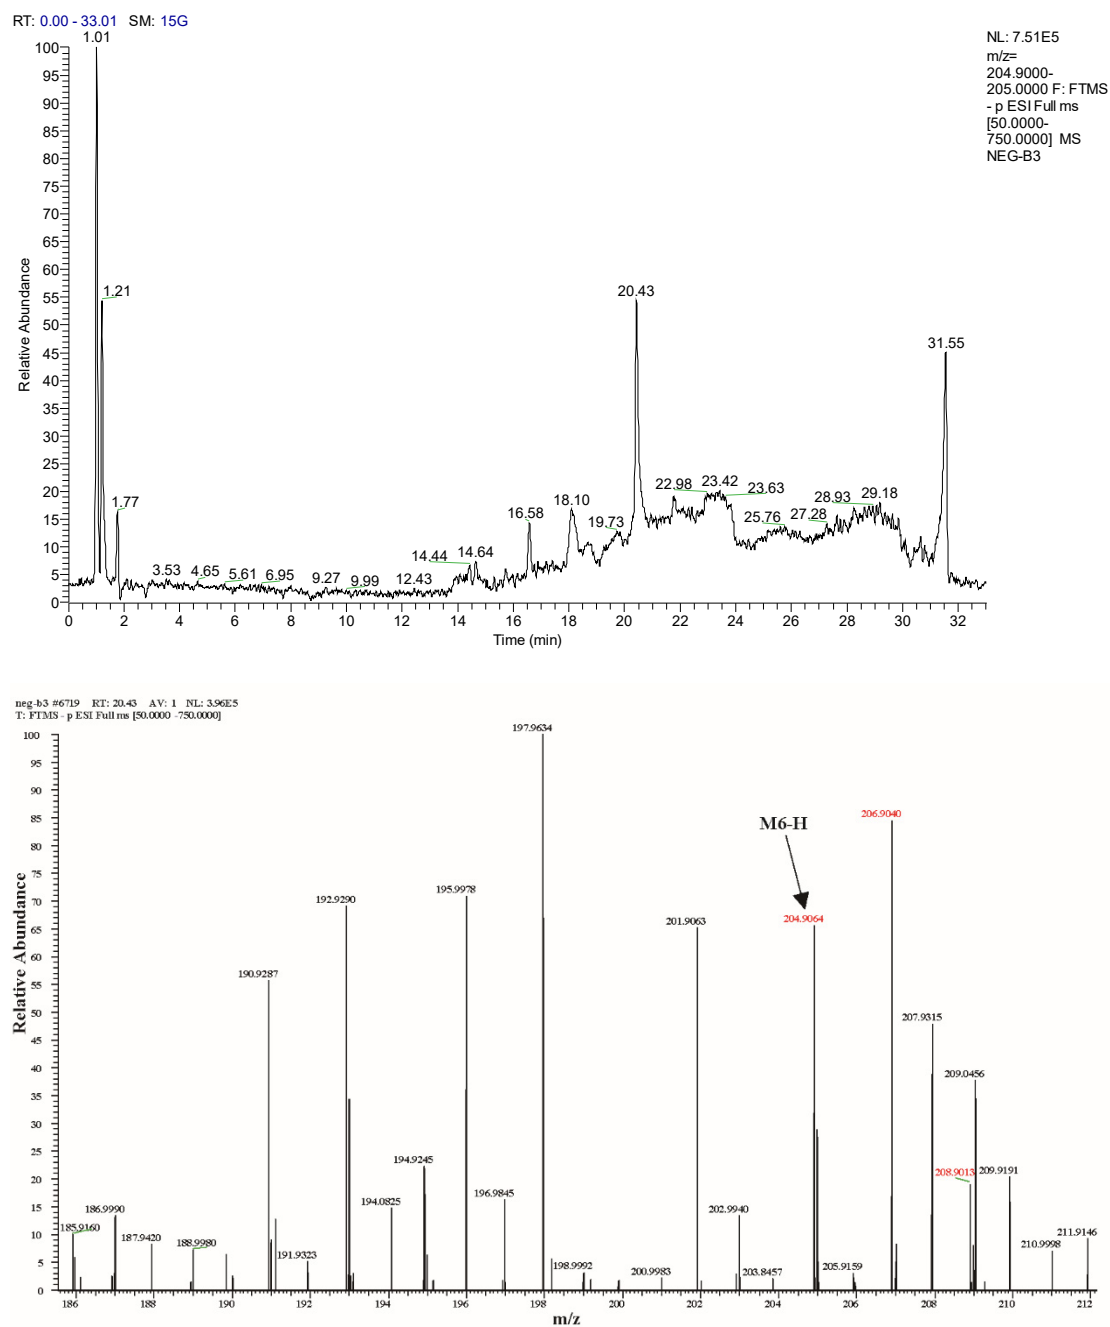

**Figure S9.** Extract ion chromatogram and secondary fragment ion of M6.

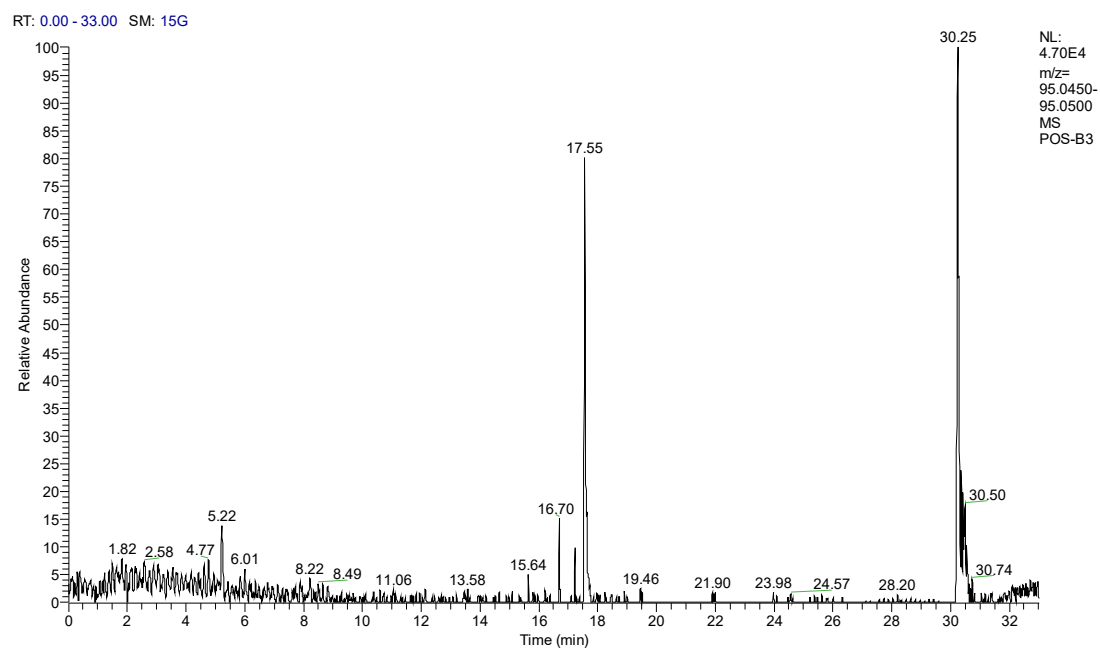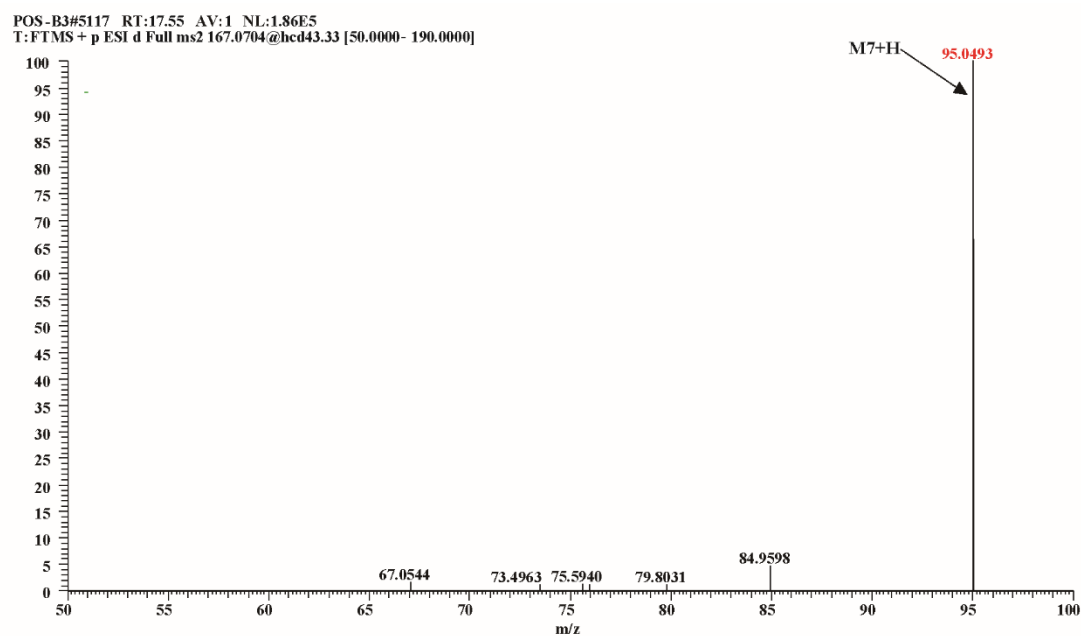

**Figure S10.** Extract ion chromatogram and secondary fragment ion of M7.

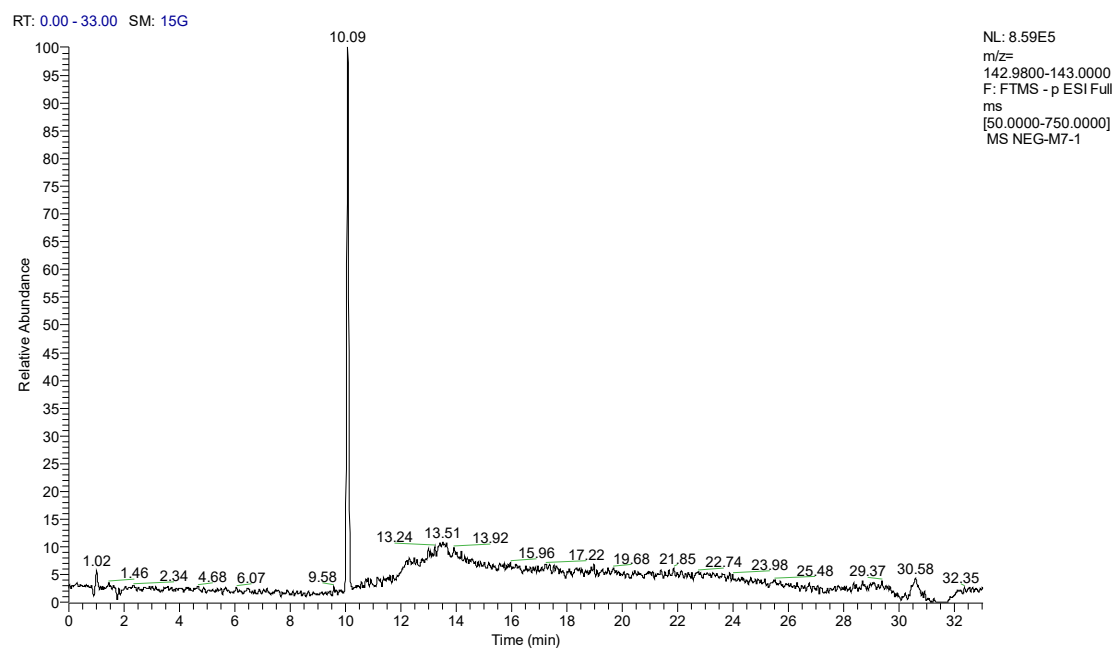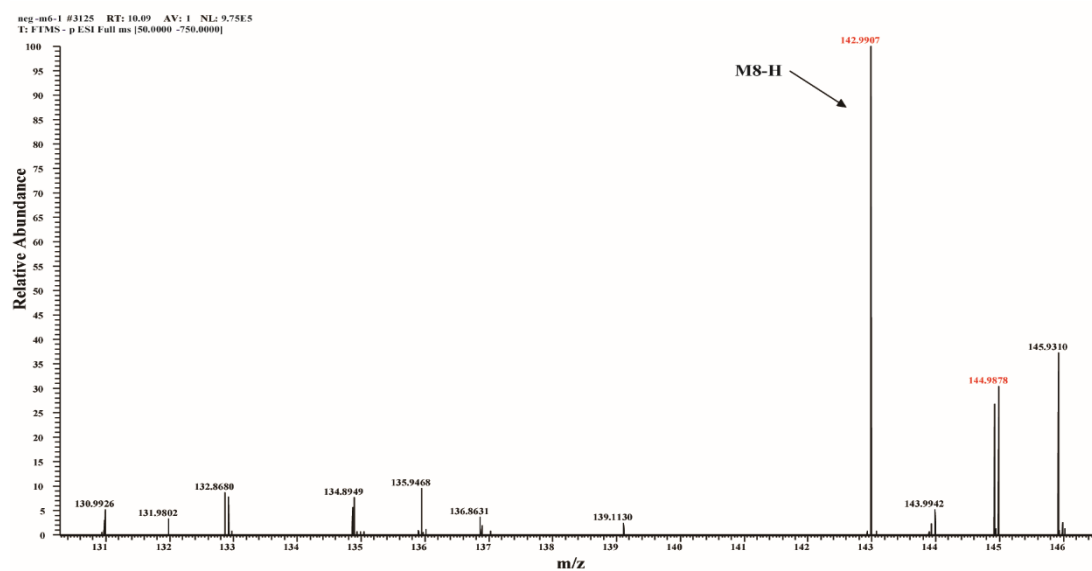

**Figure S11.** Extract ion chromatogram and secondary fragment ion of M8.

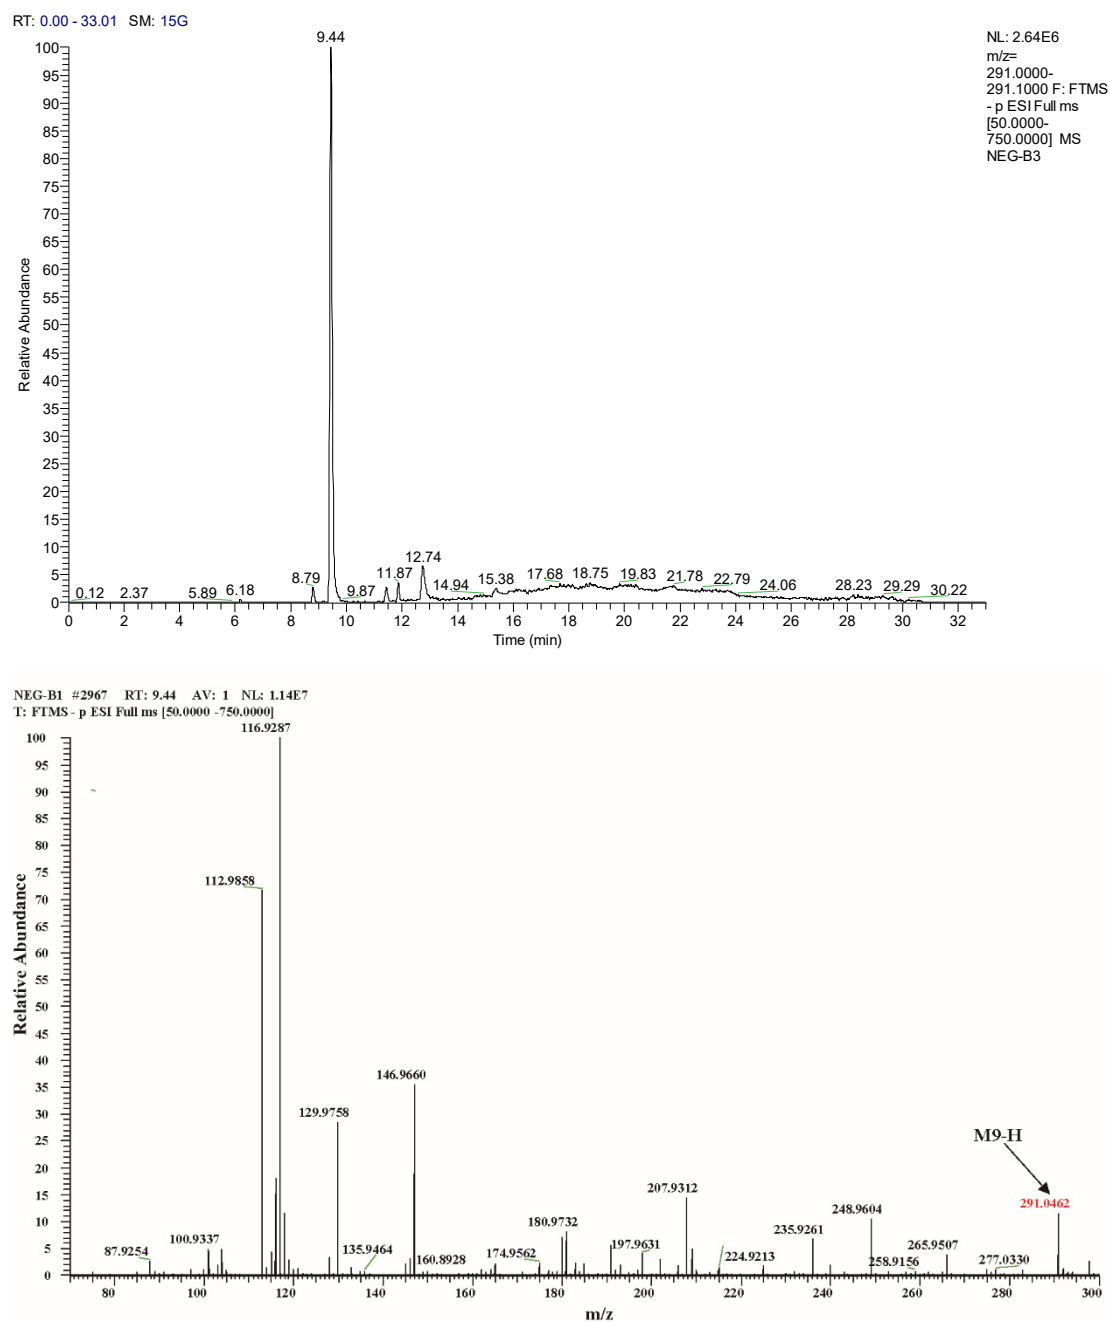

**Figure S12.** Extract ion chromatogram and secondary fragment ion of M9.

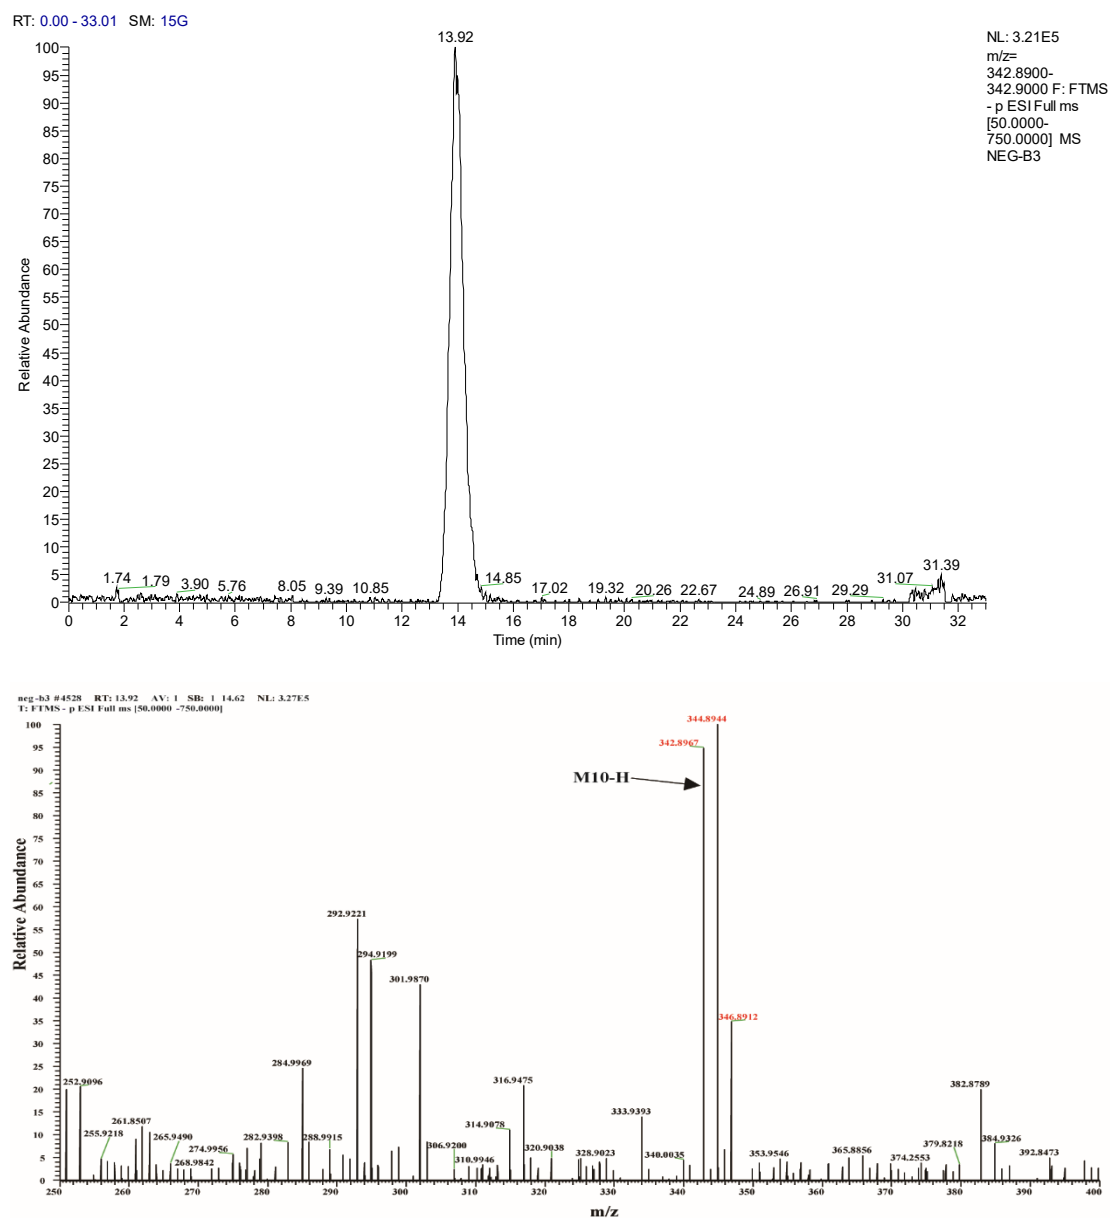

**Figure S13.** Extract ion chromatogram and secondary fragment ion of M10.

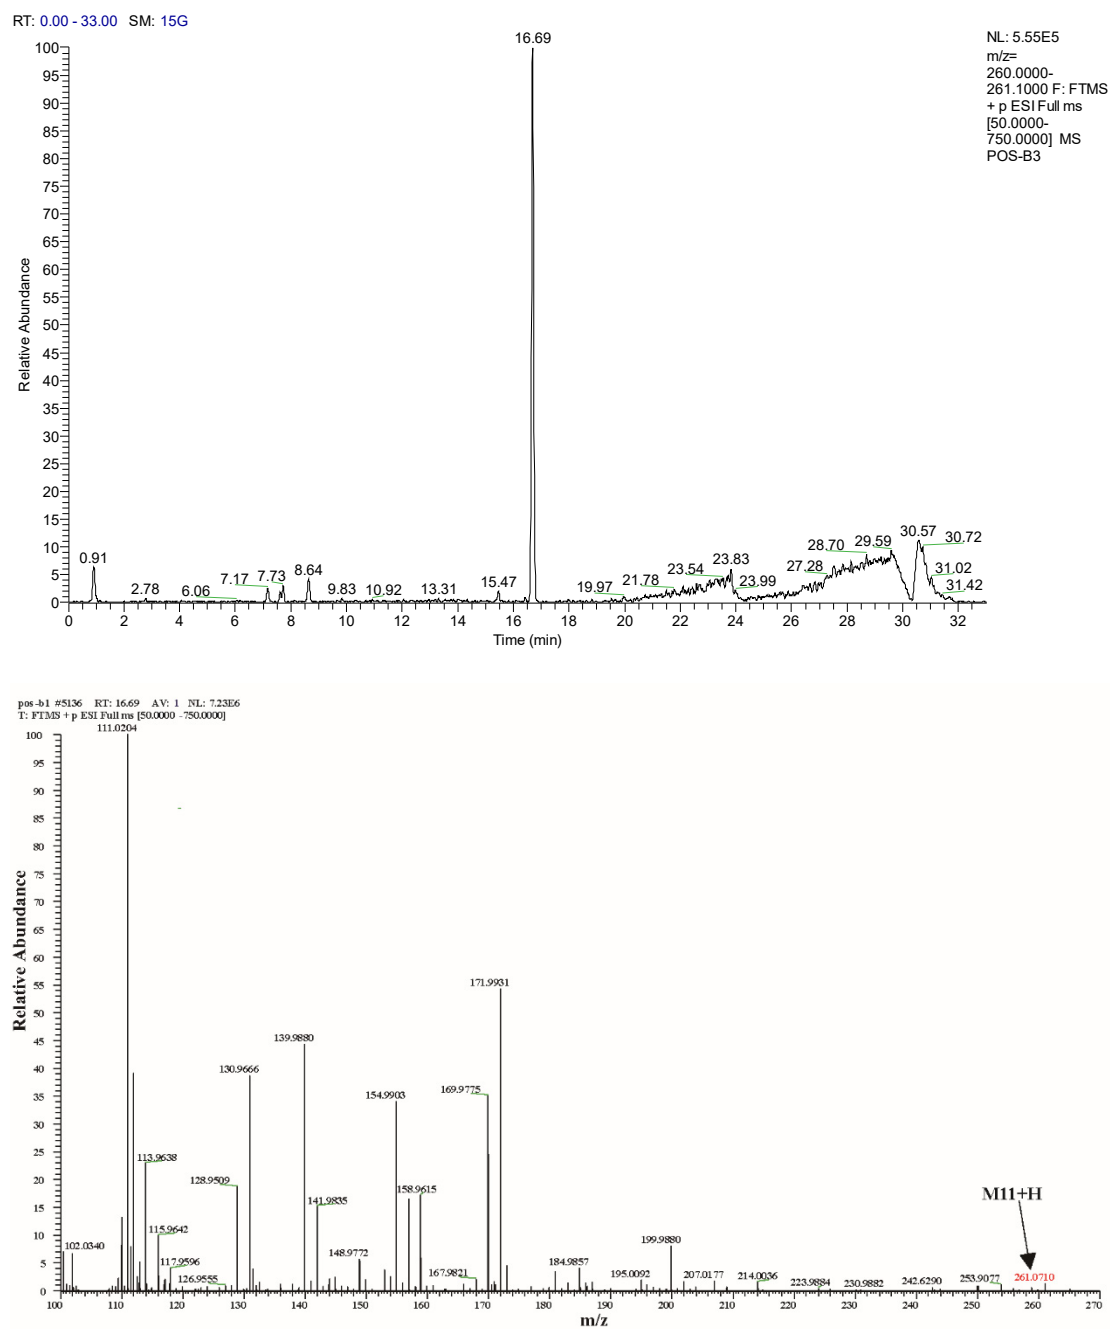

**Figure S14.** Extract ion chromatogram and secondary fragment ion of M11.

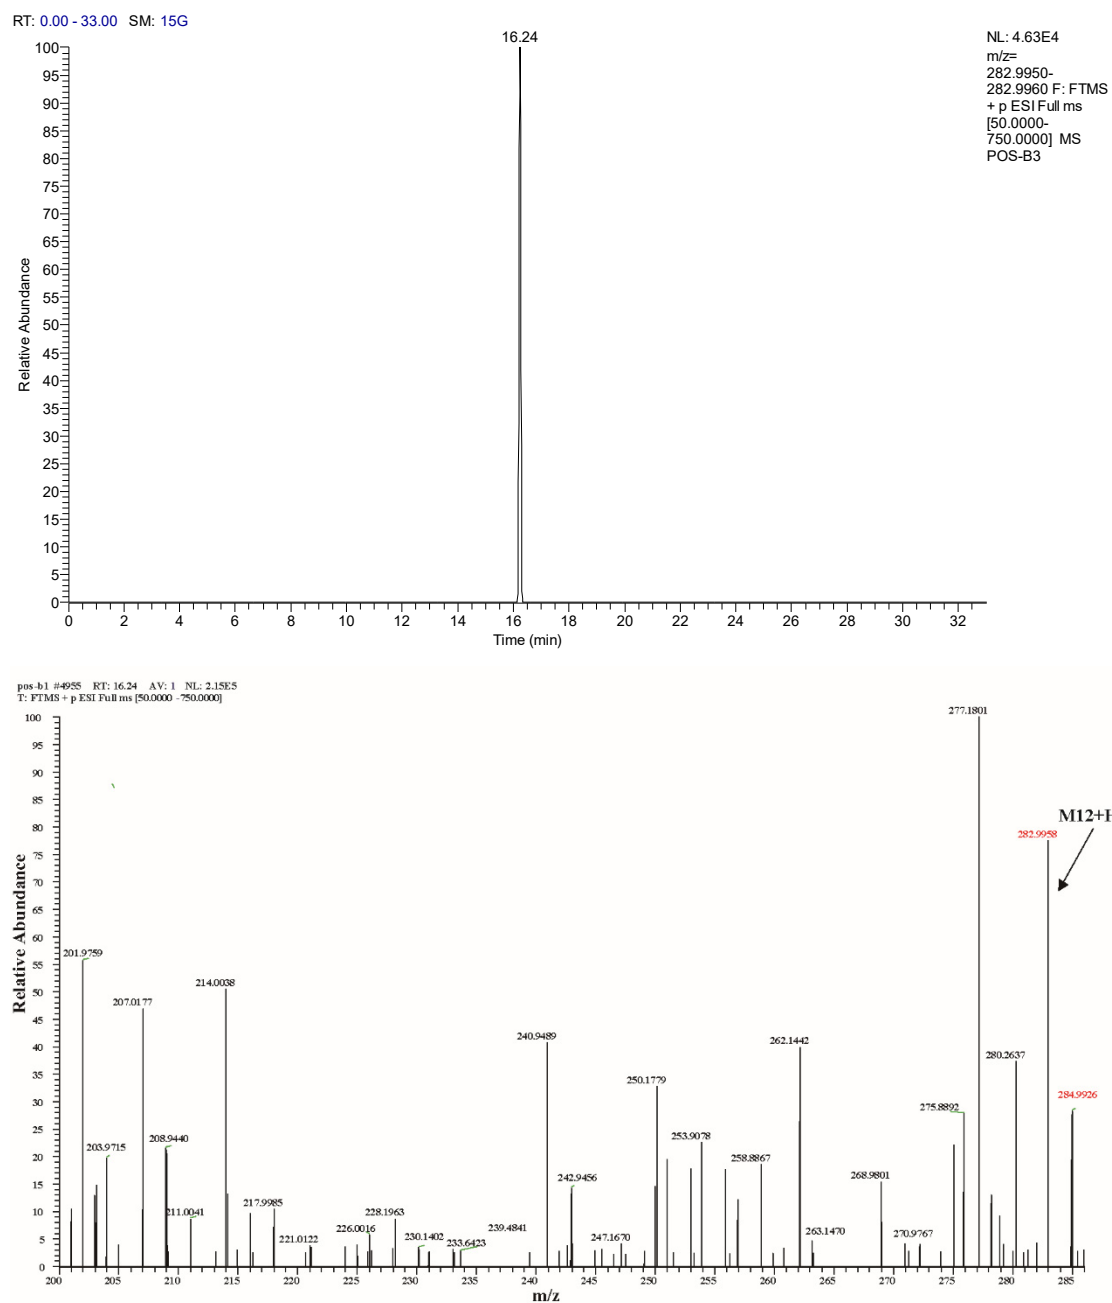

**Figure S15.** Extract ion chromatogram and secondary fragment ion of M12.



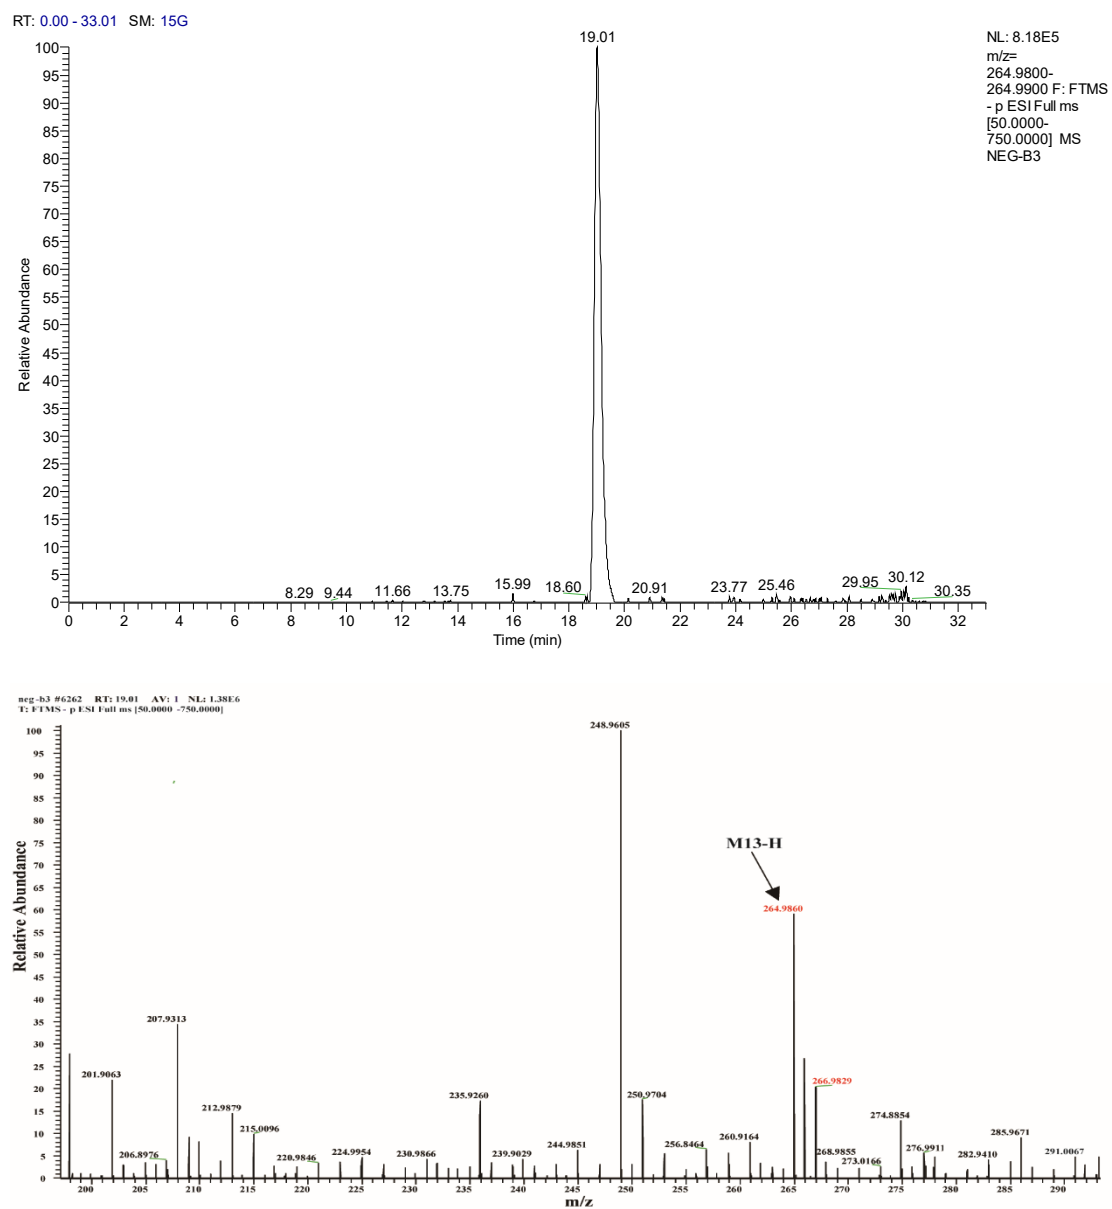

**Figure S16.** Extract ion chromatogram and secondary fragment ion of M13.

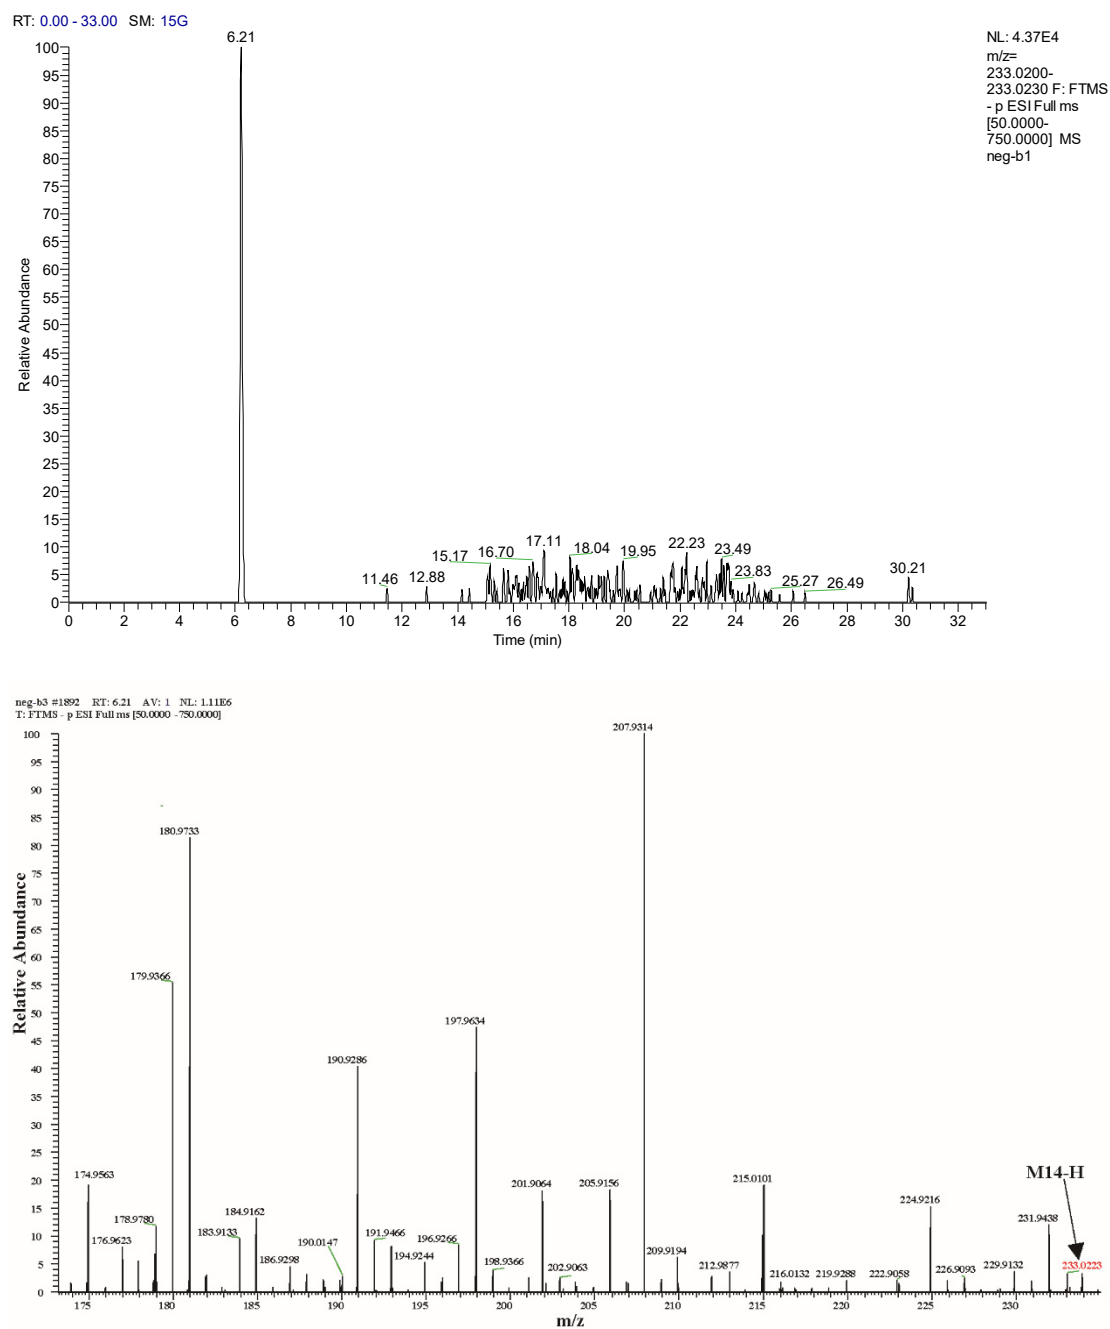

**Figure S17.** Extract ion chromatogram and secondary fragment ion of M14.

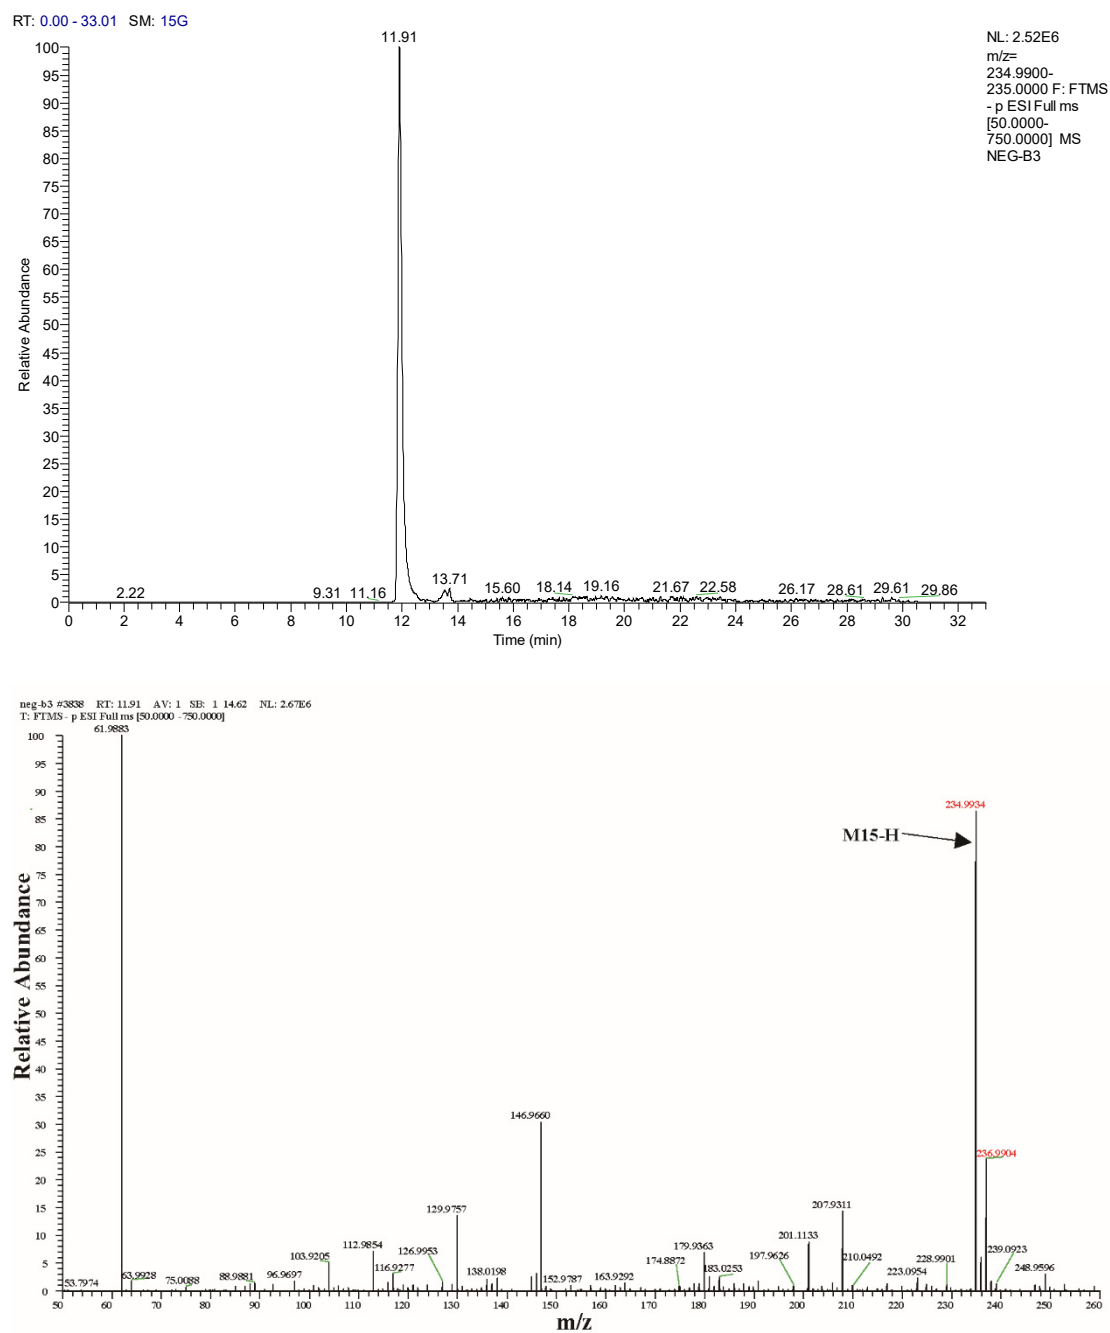

**Figure S18.** Extract ion chromatogram and secondary fragment ion of M15.

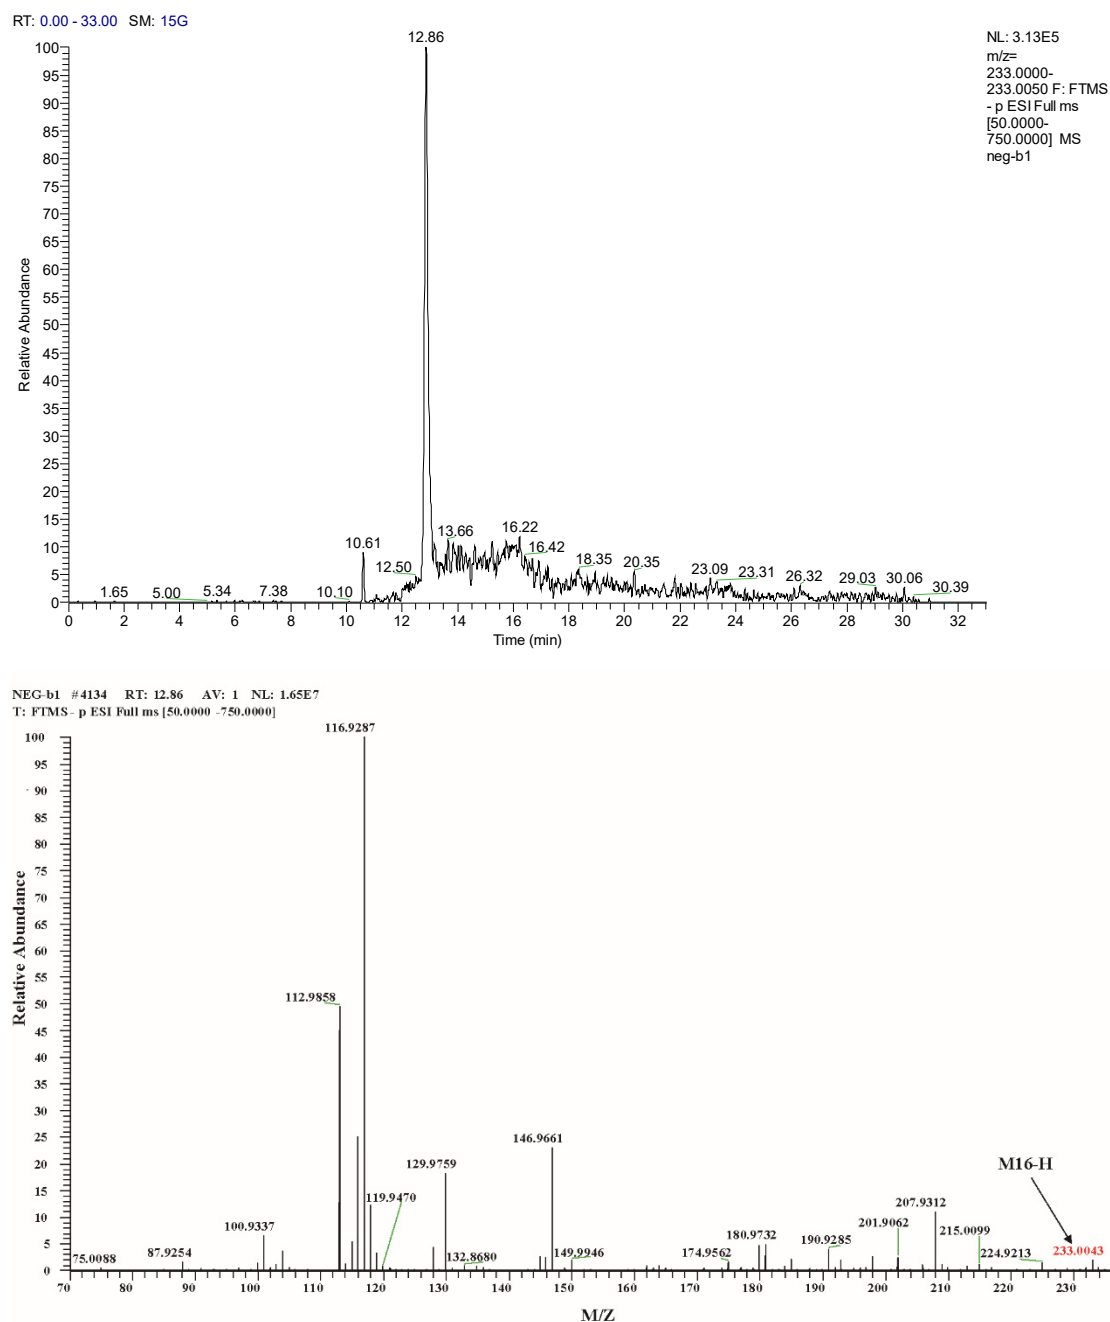

**Figure S19.** Extract ion chromatogram and secondary fragment ion of M16.

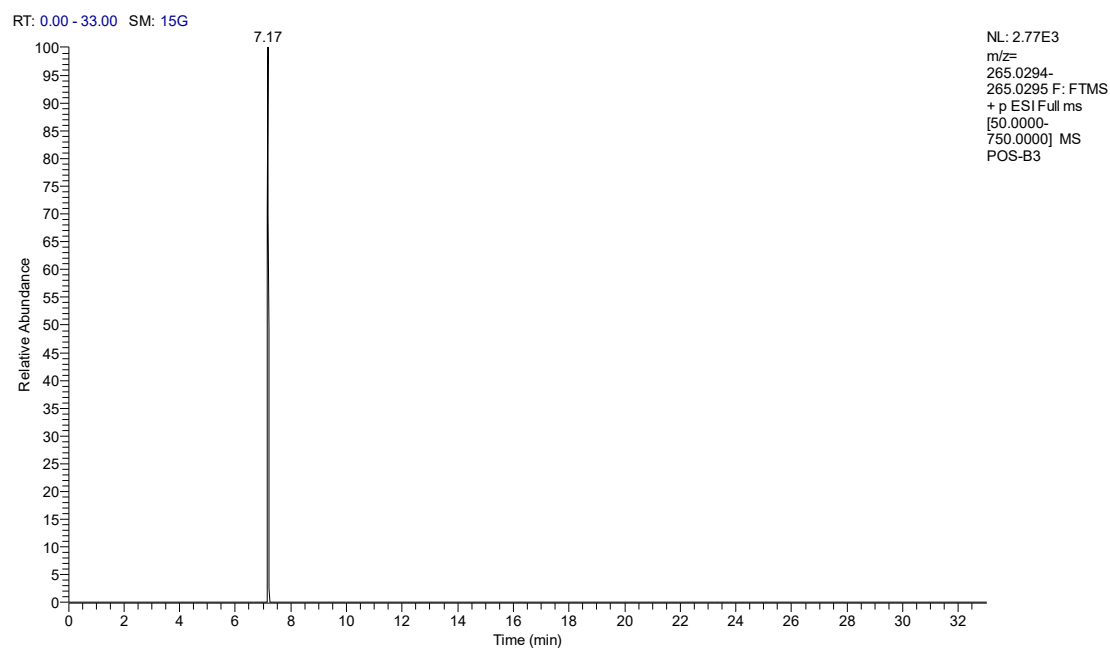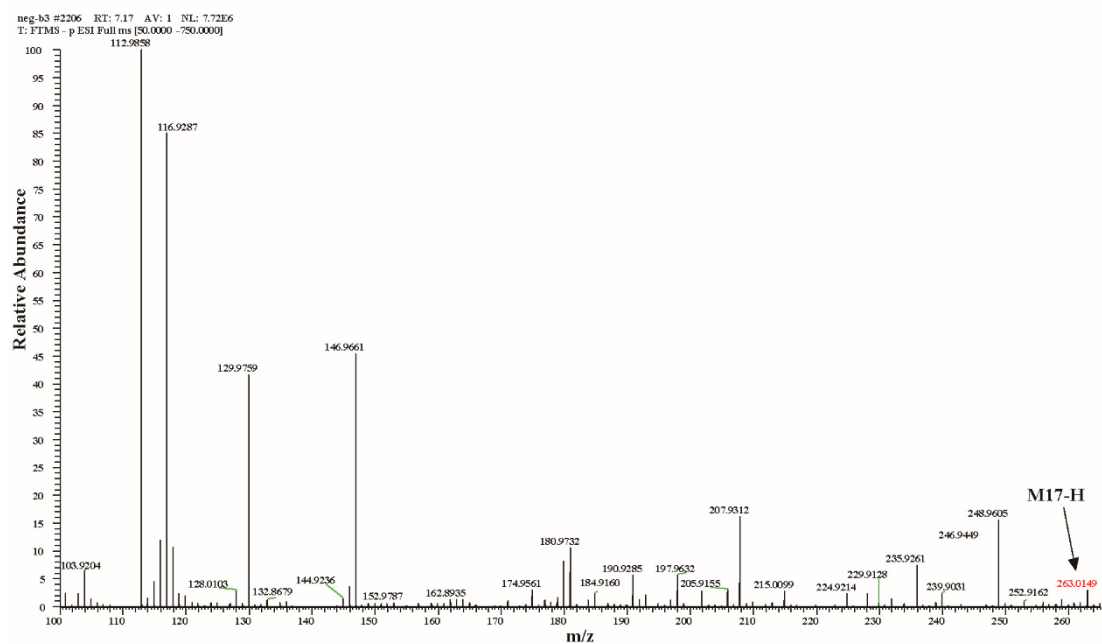

**Figure S20.** Extract ion chromatogram and secondary fragment ion of M17.

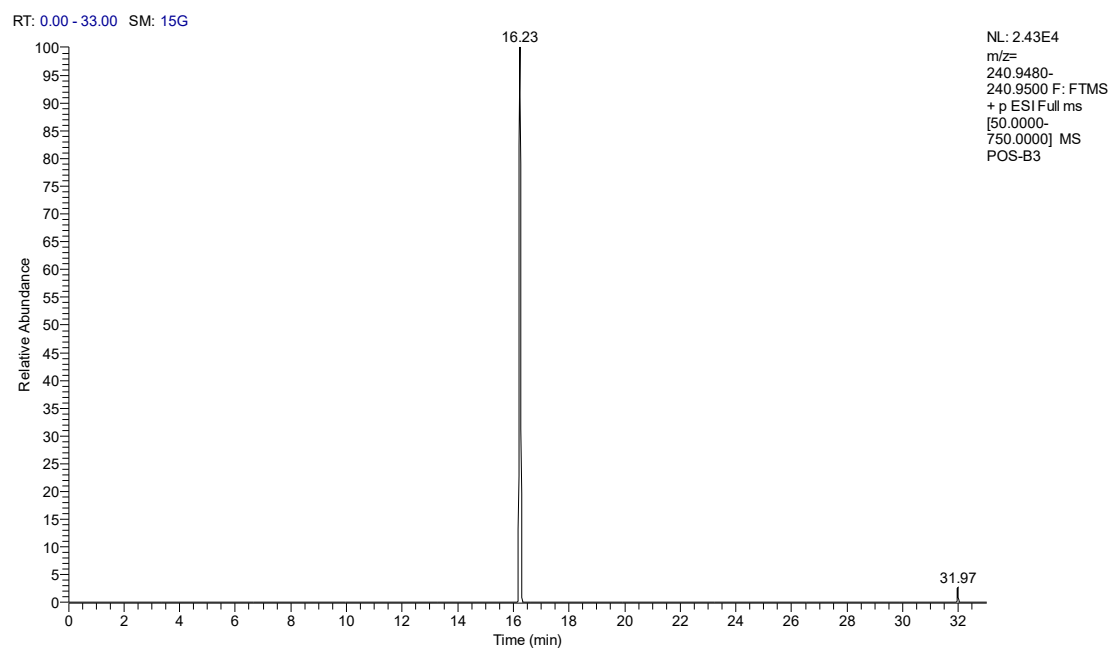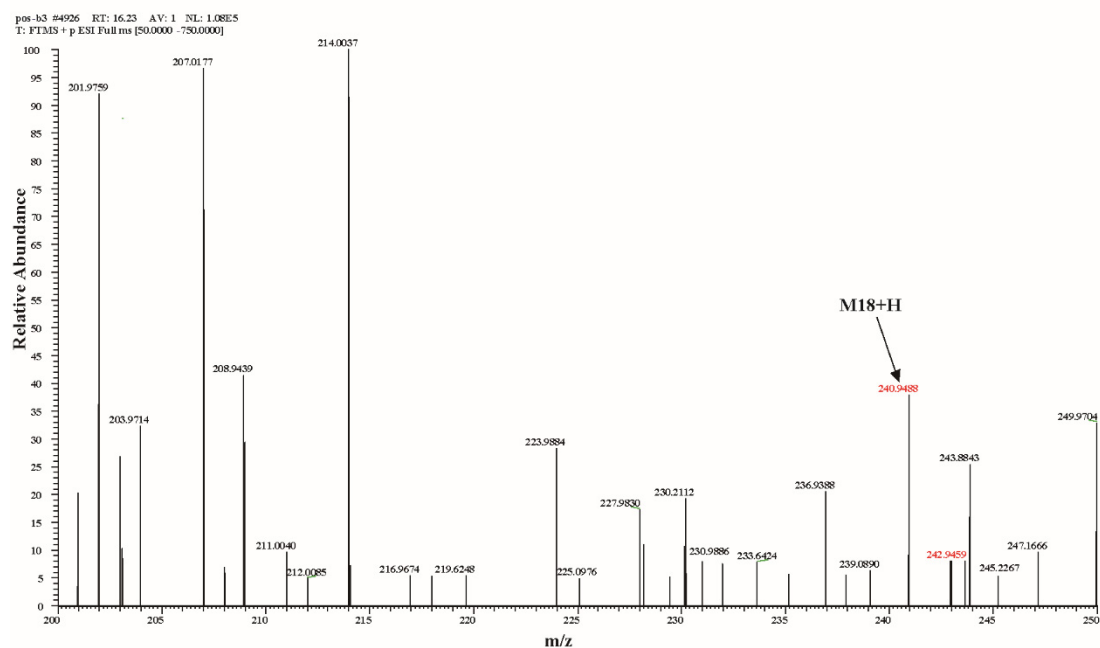

**Figure S21.** Extract ion chromatogram and secondary fragment ion of M18.

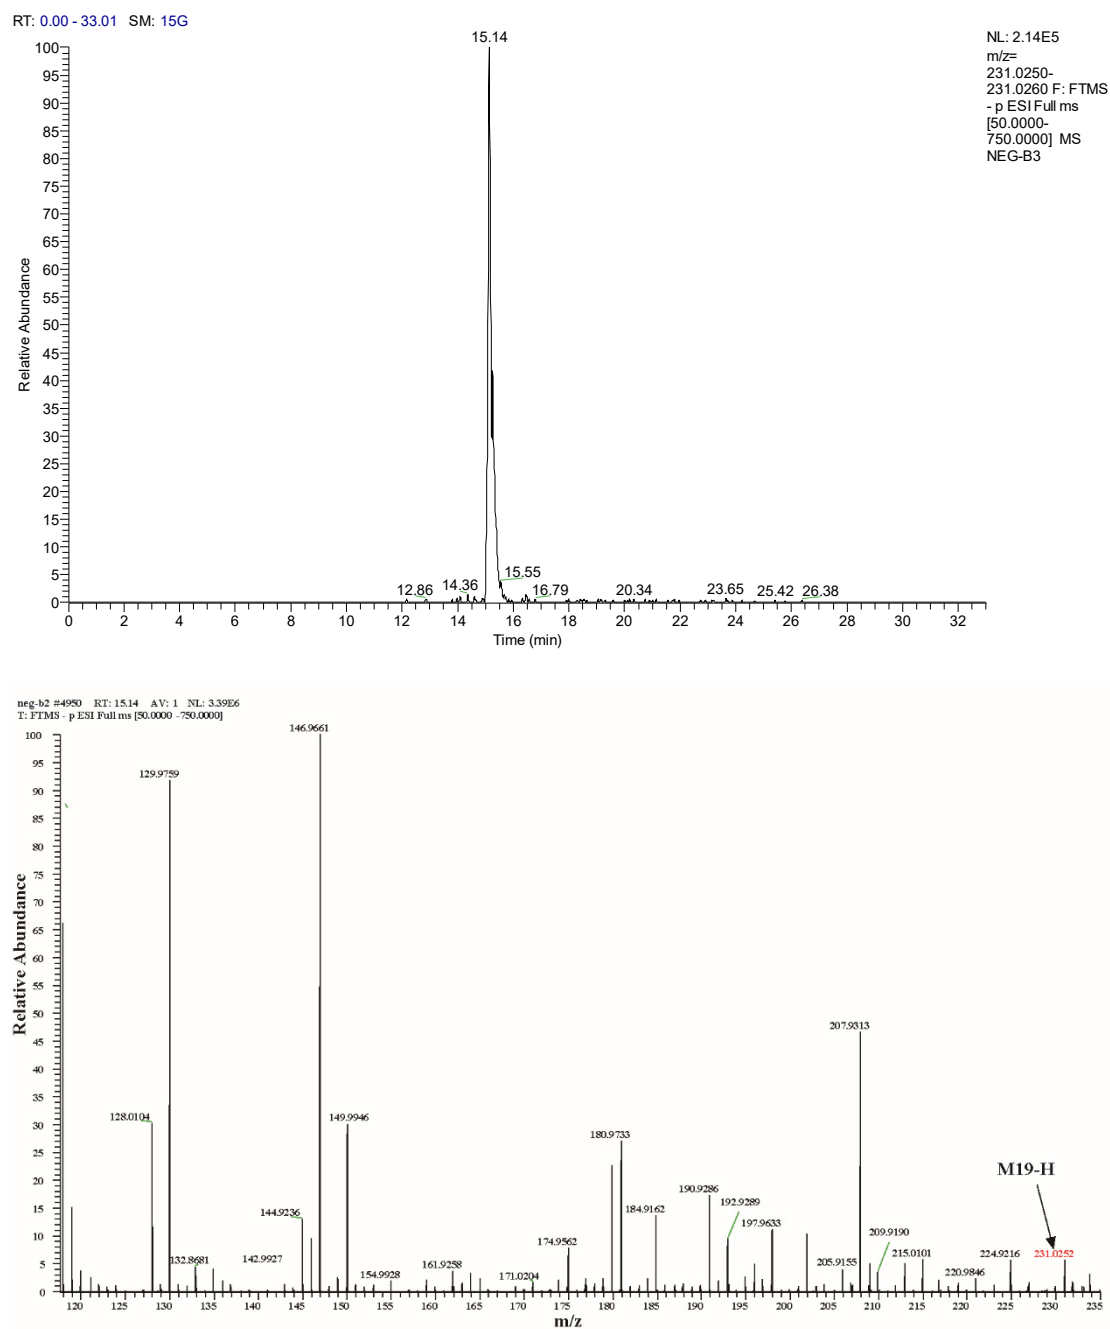

**Figure S22.** Extract ion chromatogram and secondary fragment ion of M19.

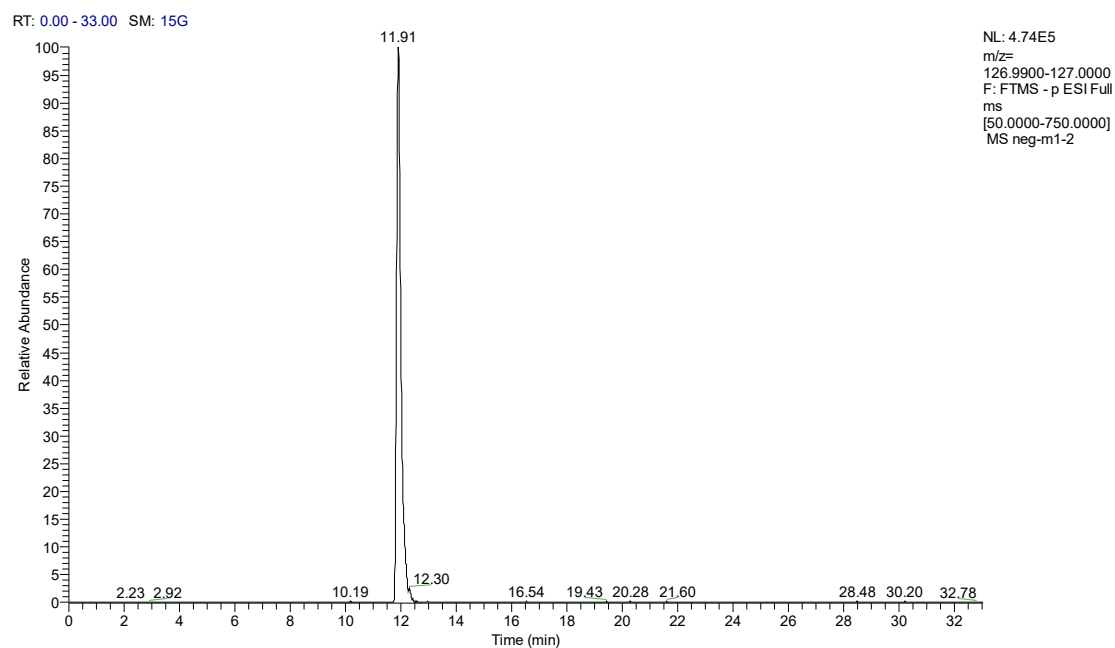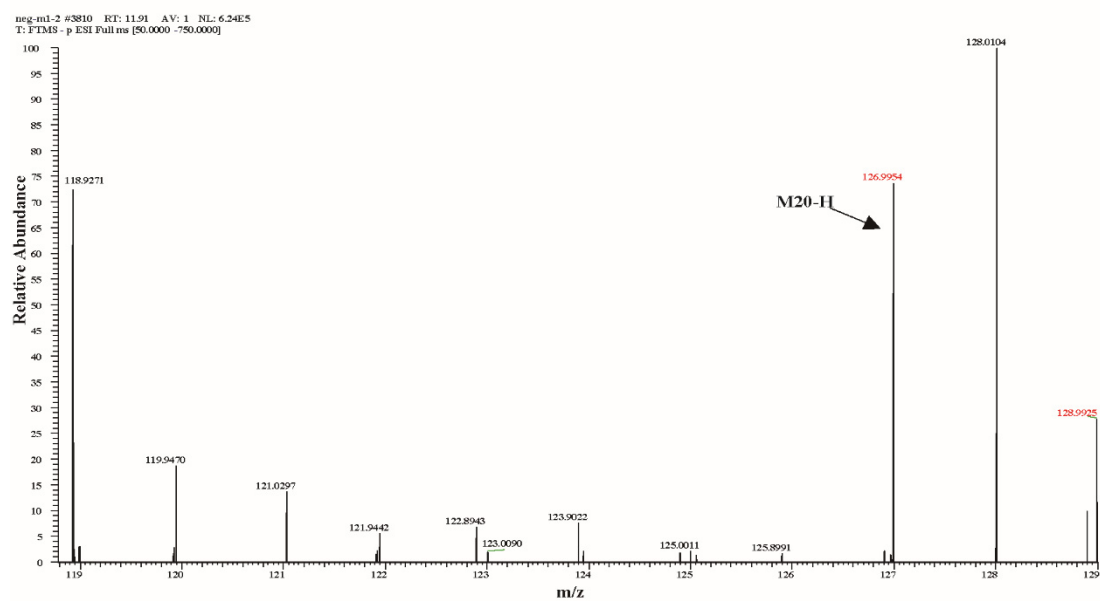

**Figure S23.** Extract ion chromatogram and secondary fragment ion of M20.



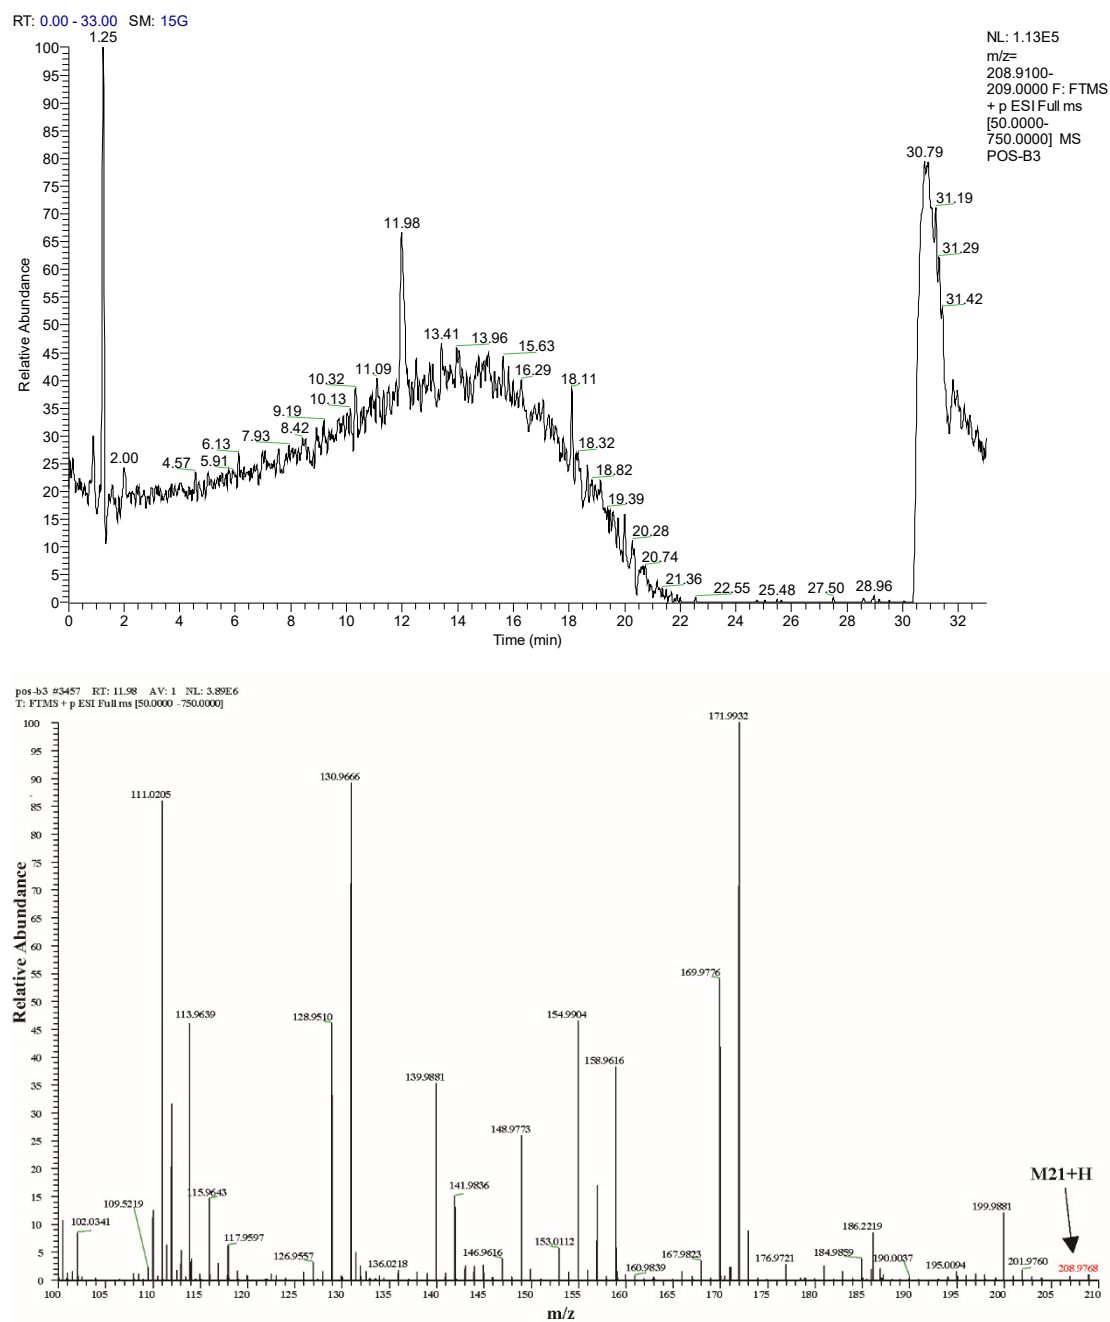

**Figure S24.** Extract ion chromatogram and secondary fragment ion of M21.

**Table S1.** Mobile phase of Thermofisher QE focus mass spectrometer (a) and Waters UPLC-Xevo TQ-S MS (b).

**(a)**

| Retention (min) | Flow (mL·min <sup>-1</sup> ) | 0.075% FA + Water (%) | Acetonitrile (%) |
|-----------------|------------------------------|-----------------------|------------------|
| 0.00            | 0.20                         | 95.00                 | 5.00             |
| 0.25            | 0.20                         | 95.00                 | 5.00             |
| 25.00           | 0.20                         | 5.00                  | 95.00            |
| 27.00           | 0.20                         | 5.00                  | 95.00            |
| 28.00           | 0.20                         | 95.00                 | 5.00             |
| 33.00           | 0.20                         | 95.00                 | 5.00             |

**(b)**

| Retention (min) | Flow (mL·min <sup>-1</sup> ) | 0.075% FA + Water (%) | Acetonitrile (%) |
|-----------------|------------------------------|-----------------------|------------------|
| 0.00            | 0.30                         | 90.00                 | 10.00            |
| 0.25            | 0.30                         | 90.00                 | 10.00            |
| 10.00           | 0.30                         | 10.00                 | 90.00            |
| 10.10           | 0.30                         | 90.00                 | 10.00            |
| 12.00           | 0.30                         | 90.00                 | 10.00            |

**Table S2.** The parent ions, daughter ion fragments and ion scanning mass spectrometry conditions of profenofos and photoproducts.

| Compound name | Retention time (min) | Parent ion (m/z) | Fragmator (eV) | Daughter (m/z)  | CE (eV) |
|---------------|----------------------|------------------|----------------|-----------------|---------|
| Profenofos    | 9.11                 | 372.9 (M+H)      | 25             | 302.6 / 127.9   | 40 / 20 |
| M1            | 4.41                 | 312.94 (M-H)     | 26             | 204.9 / 78.85   | 22 / 44 |
| M2            | 5.73                 | 328.92 (M-H)     | 24             | 168.91 / 78.85  | 26 / 36 |
| M3            | 7.97                 | 295.05 (M+H)     | 24             | 224.98 / 128.92 | 16 / 30 |
| M4            | 4.20                 | 251.01 (M-H)     | 18             | 142.97 / 126.96 | 14 / 18 |
| M5            | 6.57                 | 309.05 (M-H)     | 28             | 141.98 / 75.01  | 20 / 20 |
| M6            | 4.49                 | 204.94 (M-H)     | 46             | 78.86 / 34.98   | 20 / 16 |

**Table S3.** Scanning mass spectrometry conditions for profenofos and its photoproducts.

| Types      | Compound name                                                                          | Molecular formula                                     | Retention time (min) | Parent ion (m/z) | $\Delta$ ppm | Chemical Structure |
|------------|----------------------------------------------------------------------------------------|-------------------------------------------------------|----------------------|------------------|--------------|--------------------|
| Profenofos | <i>O</i> -(4-bromo-2-chlorophenyl) <i>O</i> -ethyl <i>S</i> -propyl phosphorothioate   | C <sub>11</sub> H <sub>15</sub> BrClO <sub>3</sub> PS | 20.41                | 372.9424 (M-H)   | 0.54         |                    |
| M1         | <i>O</i> -(4-bromo-2-chlorophenyl)- <i>O</i> -ethyl phosphate                          | C <sub>8</sub> H <sub>9</sub> BrClO <sub>4</sub> P    | 18.11                | 312.9038 (M-H)   | /            |                    |
| M2         | <i>O</i> -(4-bromo-2-chlorophenyl) <i>O</i> -ethyl <i>S</i> -hydrogen phosphorothioate | C <sub>8</sub> H <sub>9</sub> BrClO <sub>3</sub> PS   | 14.79                | 328.8809 (M-H)   | 1.22         |                    |
| M3         | <i>O</i> -(2-chlorophenyl) <i>O</i> -ethyl <i>S</i> -propyl phosphorothioate           | C <sub>11</sub> H <sub>16</sub> ClO <sub>3</sub> PS   | 18.12                | 295.0319 (M+H)   | 1.36         |                    |
| M4         | <i>O</i> -(2-chlorophenyl) <i>O</i> -ethyl <i>S</i> -hydrogen phosphorothioate         | C <sub>8</sub> H <sub>10</sub> ClO <sub>3</sub> PS    | 18.86                | 252.9850 (M+H)   | /            |                    |
| M5         | <i>O</i> -(2-chloro-4-hydroxyphenyl) <i>O</i> -ethyl <i>S</i> -propyl phosphorothioate | C <sub>11</sub> H <sub>16</sub> ClO <sub>4</sub> PS   | 16.23                | 309.0123 (M-H)   | 1.29         |                    |
| M6         | 4-bromo-2-chlorophenol                                                                 | C <sub>6</sub> H <sub>4</sub> BrClO                   | 20.43                | 204.9061 (M-H)   | 1.47         |                    |
| M7         | phenol                                                                                 | C <sub>6</sub> H <sub>6</sub> O                       | 17.55                | 95.0491 (M+H)    | 2.11         |                    |

|     |                                                                                           |               |       |                   |       |                                                                                       |
|-----|-------------------------------------------------------------------------------------------|---------------|-------|-------------------|-------|---------------------------------------------------------------------------------------|
| M8  | 2-chlorobenzene-1,4-diol                                                                  | C6H5ClO2      | 10.09 | 142.9905<br>(M-H) | 1.41  | 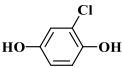   |
| M9  | <i>O</i> -(2,4-dihydroxyphenyl) <i>O</i> -ethyl <i>S</i> -propyl phosphorothioate         | C11H17O5PS    | 9.44  | 291.0462<br>(M-H) | /     |    |
| M10 | <i>O</i> -(4-bromo-2-chlorophenyl) <i>S</i> -propyl <i>O</i> -hydrogen phosphorothioate   | C9H11BrClO3PS | 13.92 | 342.8966<br>(M-H) | 0.29  |    |
| M11 | <i>O</i> -ethyl <i>O</i> -phenyl <i>S</i> -propyl phosphorothioate                        | C11H17O3PS    | 16.69 | 261.0709<br>(M+H) | 0.38  |    |
| M12 | <i>O</i> -(2-chloro-4-hydroxyphenyl) <i>S</i> -propyl <i>O</i> -hydrogen phosphorothioate | C9H12ClO4PS   | 16.24 | 282.9955<br>(M+H) | 1.06  |    |
| M13 | <i>O</i> -(2-chlorophenyl) <i>S</i> -propyl <i>O</i> -hydrogen phosphorothioate           | C9H12ClO3PS   | 19.01 | 264.9861<br>(M-H) | -0.38 |    |
| M14 | 2,4-dihydroxyphenyl ethyl hydrogen phosphate                                              | C8H11O6P      | 6.21  | 233.0220<br>(M-H) | 1.29  |    |
| M15 | 2-chlorophenyl ethyl hydrogen phosphate                                                   | C8H10ClO4P    | 11.91 | 234.9932<br>(M-H) | 0.85  |    |
| M16 | <i>O</i> -ethyl <i>O</i> -(2-hydroxyphenyl) <i>S</i> -hydrogen phosphorothioate           | C8H11O4PS     | 12.86 | 233.0043<br>(M-H) | /     |   |
| M17 | <i>O</i> -(2,4-dihydroxyphenyl) <i>S</i> -propyl <i>O</i> -hydrogen phosphorothioate      | C9H13O5PS     | 7.17  | 263.0149<br>(M-H) | /     |  |
| M18 | <i>O</i> -(2-chloro-4-hydroxyphenyl) <i>O</i> , <i>S</i> -dihydrogen phosphorothioate     | C6H6ClO4PS    | 16.23 | 240.9486<br>(M+H) | 0.83  |  |
| M19 | <i>O</i> -phenyl <i>S</i> -propyl <i>O</i> -hydrogen phosphorothioate                     | C9H13O3PS     | 15.14 | 231.0250<br>(M-H) | 0.87  |  |
| M20 | 2-chlorophenol                                                                            | C6H5ClO       | 11.91 | 126.9956<br>(M-H) | -1.59 |  |
| M21 | 2-chlorophenyl dihydrogen phosphate                                                       | C6H6ClO4P     | 11.98 | 208.9765<br>(M+H) | 1.44  |  |

**Table S4.** Precision and accuracy of the analytical method.

| name       | Spiked level<br>(mg·kg <sup>-1</sup> ) | Average<br>recovery (%) | RSD (%) | LOD<br>(μg·kg <sup>-1</sup> ) | LOQ<br>(μg·kg <sup>-1</sup> ) |
|------------|----------------------------------------|-------------------------|---------|-------------------------------|-------------------------------|
| Profenofos | 0.01                                   | 95.2                    | 2.1     | 1                             | 3                             |
|            | 0.1                                    | 85.2                    | 4.5     |                               |                               |
|            | 1                                      | 100.6                   | 3.2     |                               |                               |
| M1         | 0.01                                   | 91.2                    | 4.6     | 0.0017                        | 0.0056                        |
|            | 0.1                                    | 96.1                    | 3.2     |                               |                               |
|            | 1                                      | 85.2                    | 2.5     |                               |                               |
| M2         | 0.01                                   | 109.7                   | 6.7     | 0.00088                       | 0.0029                        |
|            | 0.1                                    | 104.9                   | 9.6     |                               |                               |
|            | 1                                      | 96.3                    | 4.2     |                               |                               |
| M3         | 0.01                                   | 103.2                   | 4.2     | 0.000065                      | 0.00022                       |
|            | 0.1                                    | 91.2                    | 5.1     |                               |                               |
|            | 1                                      | 96.8                    | 5.0     |                               |                               |
| M4         | 0.01                                   | 92.5                    | 5.2     | 0.00049                       | 0.0016                        |
|            | 0.1                                    | 97.4                    | 3.6     |                               |                               |
|            | 1                                      | 88.2                    | 2.8     |                               |                               |
| M5         | 0.01                                   | 101.3                   | 4.8     | 0.0012                        | 0.0039                        |
|            | 0.1                                    | 95.3                    | 2.7     |                               |                               |
|            | 1                                      | 102.5                   | 3.6     |                               |                               |
| M6         | 0.01                                   | 85.6                    | 5.1     | 0.005                         | 0.017                         |
|            | 0.1                                    | 99.4                    | 6.5     |                               |                               |
|            | 1                                      | 98.6                    | 2.5     |                               |                               |
| Myricetin  | 0.01                                   | 93.5                    | 3.2     | 0.011                         | 0.037                         |
|            | 0.1                                    | 97.4                    | 1.3     |                               |                               |
|            | 1                                      | 102.8                   | 4.1     |                               |                               |

**Table S5.** Photoproducts toxicity prediction by ECOSAR.

| Compounds  | Acute toxicity (mg·L <sup>-1</sup> ) |                                     |                                         | Chronic toxicity (mg·L <sup>-1</sup> ) |                                     |                                         |
|------------|--------------------------------------|-------------------------------------|-----------------------------------------|----------------------------------------|-------------------------------------|-----------------------------------------|
|            | Fish<br>(96 h LC <sub>50</sub> )     | Daphnid<br>(48 h LC <sub>50</sub> ) | Green algae<br>(96 h EC <sub>50</sub> ) | Fish<br>(96 h LC <sub>50</sub> )       | Daphnid<br>(48 h LC <sub>50</sub> ) | Green algae<br>(96 h EC <sub>50</sub> ) |
| Profenofos | 0.836                                | 0.0013                              | 3.12                                    | 0.0076                                 | /                                   | 3.28                                    |
| M1         | 24.8                                 | 15.6                                | 17.9                                    | 2.74                                   | 2.04                                | 5.94                                    |
| M2         | 2.55                                 | 0.0043                              | 187                                     | 0.011                                  | /                                   | 24.8                                    |
| M3         | 1.35                                 | 0.0022                              | 28.5                                    | 0.0079                                 | /                                   | 9                                       |
| M4         | 3.98                                 | 0.0071                              | 1650                                    | 0.011                                  | /                                   | 65.6                                    |
| M5         | 2.1                                  | 0.0035                              | 113                                     | 0.0096                                 | /                                   | 18.6                                    |
| M6         | 5.38                                 | 3.74                                | 0.493 ↑                                 | 0.593                                  | 0.492                               | 1.34 ↑                                  |
| M7         | 27.7                                 | 9.64                                | 2.4 ↑                                   | 2.61                                   | 0.969                               | 4.53                                    |
| M8         | 0.156 ↑                              | 0.173                               | 0.289 ↑                                 | 0.0098                                 | 0.142                               | 0.462 ↑                                 |
| M9         | 4.89                                 | 0.0088                              | 2340                                    | 0.013                                  | /                                   | 84.3                                    |
| M10        | 338                                  | 185                                 | 119                                     | 31.7                                   | 28.8                                | 16.4                                    |
| M11        | 2.01                                 | 0.0034                              | 148                                     | 0.0084                                 | /                                   | 19.6                                    |
| M12        | 9.27                                 | 6.03                                | 0.845 ↑                                 | 1.01                                   | 0.772                               | 2.22 ↑                                  |
| M13        | 12.6                                 | 8.15                                | 10.3                                    | 1.44                                   | 1.13                                | 3.57                                    |
| M14        | 80.9                                 | 1090                                | 14.1                                    | 54.8                                   | 442                                 | 1.55 ↑                                  |
| M15        | 117                                  | 68                                  | 55.6                                    | 11.7                                   | 7.06                                | 15.3                                    |
| M16        | 9.14                                 | 0.0018                              | 33700                                   | 0.014                                  | /                                   | 293                                     |
| M17        | 284                                  | 5300                                | 30.5                                    | 218                                    | 2260                                | 2.95 ↑                                  |
| M18        | 88.9                                 | 29                                  | 7.64                                    | 8.26                                   | 2.84                                | 14                                      |
| M19        | 41.7                                 | 25.4                                | 25                                      | 4.42                                   | 2.99                                | 7.62                                    |
| M20        | 0.095 ↑                              | 0.738                               | 0.047 ↑                                 | 0.0091                                 | 4.87                                | 0.011                                   |
| M21        | 13.7                                 | 6.35                                | 1.21 ↑                                  | 1.37                                   | 0.715                               | 2.67 ↑                                  |

Note: Toxicity categories: highly toxic (< 1 mg·L<sup>-1</sup>, red); moderately toxic (1–10 mg·L<sup>-1</sup>, Yellow); slightly toxic (10–100 mg·L<sup>-1</sup>, pale green); non-toxic (> 100 mg·L<sup>-1</sup>, green).

**Table S6.** Effect of myricetin on the decrease in photodegradation of four pesticides.

| Name             | Ratio | degradation rate (%) | Degradation rate with myricetin (%) |
|------------------|-------|----------------------|-------------------------------------|
| Methyl parathion | 1:5   | 32.6                 | 27.9                                |
| Malathion        | 1:5   | 29.5                 | 25.3                                |
| Cyhalofop-butyl  | 1:5   | 65.6                 | 38.1                                |
| Imidacloprid     | 1:5   | 82.7                 | 50.1                                |

Note: (1) Light intensity: HPML, 7.2×10<sup>6</sup>–9.5×10<sup>6</sup> lx, 25±1°C; (2) Reaction time: 10 min; (3) Three parallel samples per group.

**Table S7.** Properties of paddy, farm ditch, and pond water.

| Surface water                                       | Paddy water | farm ditch water | Pond water |
|-----------------------------------------------------|-------------|------------------|------------|
| Dissolved oxygen<br>(mg·L <sup>-1</sup> )           | 6.0         | 5.4              | 3.6        |
| turbidity NTU                                       | 3.1         | 1.6              | 46.8       |
| conductivity (us·cm <sup>-1</sup> )                 | 162         | 344              | 302        |
| pH                                                  | 7.4         | 7.2              | 7.3        |
| hardness (mg·L <sup>-1</sup> )                      | 62          | 110              | 96         |
| COD (mg·L <sup>-1</sup> )                           | 4           | 5                | 13         |
| BOD (mg·L <sup>-1</sup> )                           | 1.0         | 1.4              | 3.5        |
| Cu <sup>2+</sup> (mg·L <sup>-1</sup> )              | <0.006      | <0.006           | <0.006     |
| Fe <sup>3+</sup> (mg·L <sup>-1</sup> )              | 0.21        | <0.02            | <0.02      |
| Cl <sup>-</sup> (mg·L <sup>-1</sup> )               | 1.00        | 1.95             | 12.2       |
| SO <sub>4</sub> <sup>2-</sup> (mg·L <sup>-1</sup> ) | 2.86        | <0.018           | 18.9       |
| NO <sub>3</sub> <sup>-</sup> (mg·L <sup>-1</sup> )  | 1.37        | 2.87             | 1.09       |
| phenols (mg·L <sup>-1</sup> )                       | <0.0003     | <0.0003          | <0.0003    |
